# Supplementary material for: Efficient emission of Zn(ii) and Cd(ii) complexes with nopinane-annelated 4,5-diazafluorene and 4,5-diazafluoren-9-one ligands: how slight structural modification alters fluorescence mechanism
Source: Royal Society of Chemistry journal article supplement (doi:10.1039/d3dt00904a), 2023-01-01

*Electronic Supplementary Information*

## **Efficient emission of Zn(II) and Cd(II) complexes with nopinane-annelated 4,5-diazaluorene and 4,5-diazaluoren-9-one ligands: how slight structural modification alters fluorescence mechanism**

Tatyana E. Kokina,<sup>\*a</sup> Nikita A. Shekhovtsov,<sup>\*a</sup> Eugene S. Vasilyev,<sup>b</sup> Ludmila A. Glinskaya,<sup>a</sup> Aleksandr V. Mikheyli,<sup>c</sup> Victor F. Plyusnin,<sup>\*c</sup> Alexey V. Tkachev<sup>\*b</sup> and Mark B. Bushuev <sup>\*a</sup>

<sup>a</sup> Nikolaev Institute of Inorganic Chemistry, Siberian Branch of Russian Academy of Sciences, 3, Acad. Lavrentiev Ave., Novosibirsk 630090, Russia. E-mail addresses: kokina@niic.nsc.ru (Tatiana E. Kokina), shekhovtsov@niic.nsc.ru (Nikita A. Shekhovtsov), bushuev@niic.nsc.ru (Mark B. Bushuev).

<sup>b</sup> N. N. Vorozhtsov Novosibirsk Institute of Organic Chemistry, Siberian Branch of Russian Academy of Sciences, 9, Acad. Lavrentiev Ave., Novosibirsk 630090, Russia. E-mail address: atkachev@nioch.nsc.ru (Alexey V. Tkachev)

<sup>c</sup> Voevodsky Institute of Chemical Kinetic and Combustion, Siberian Branch of Russian Academy of Sciences, 3, Institutskaya st., Novosibirsk 630090, Russia. E-mail address: plyusnin@kinetics.nsc.ru (Victor F. Plyusnin)

# Table of Contents

|                                 |    |
|---------------------------------|----|
| Experimental part.....          | 3  |
| Crystallographic data .....     | 3  |
| Table S1.....                   | 3  |
| Table S2.....                   | 4  |
| Table S3.....                   | 5  |
| Figure S1 .....                 | 6  |
| Figure S2 .....                 | 6  |
| Figure S3 .....                 | 6  |
| Figure S4 .....                 | 7  |
| Figure S5 .....                 | 7  |
| Figure S6 .....                 | 8  |
| Figure S7 .....                 | 8  |
| Figure S8 .....                 | 9  |
| Figure S9 .....                 | 9  |
| Figure S10 .....                | 10 |
| Figure S11 .....                | 10 |
| Figure S12 .....                | 10 |
| Figure S13 .....                | 11 |
| Figure S14 .....                | 11 |
| Figure S15 .....                | 12 |
| Figure S16 .....                | 12 |
| Figure S17 .....                | 13 |
| Figure S18 .....                | 13 |
| Figure S19 .....                | 13 |
| Thermogravimetric analysis..... | 14 |
| Figure S20 .....                | 14 |
| IR spectroscopy.....            | 14 |
| Figure S21 .....                | 14 |
| Figure S22 .....                | 14 |
| Table S4.....                   | 15 |
| Theoretical part.....           | 16 |
| Table S5.....                   | 16 |
| Table S6.....                   | 17 |
| Table S7.....                   | 18 |
| Table S8.....                   | 19 |
| Table S9.....                   | 20 |
| Table S10 .....                 | 21 |
| Table S11 .....                 | 22 |
| Table S12 .....                 | 23 |
| Table S13 .....                 | 25 |
| Figure S23 .....                | 25 |
| Table S14 .....                 | 25 |
| Table S15 .....                 | 26 |
| Figure S24 .....                | 27 |
| Table S16 .....                 | 27 |
| Table S17 .....                 | 28 |
| Figure S25 .....                | 28 |
| Table S18 .....                 | 29 |
| Table S19 .....                 | 29 |
| Figure S26 .....                | 30 |
| Table S20 .....                 | 30 |
| Table S21 .....                 | 31 |
| Table S22 .....                 | 31 |
| Table S23 .....                 | 32 |
| Table S24 .....                 | 32 |

## Experimental part

### Crystallographic data

**Table S1.** Crystallographic characteristics, experimental data and structure refinement for  $[\text{ZnL}^{\text{O}}\text{Cl}_2]\cdot\text{MeCN}$  and  $[\text{CdL}^{\text{O}}\text{Cl}_2]_n\cdot n\text{H}_2\text{O}$ .

| Complex                                          | $[\text{ZnL}^{\text{O}}\text{Cl}_2]\cdot\text{MeCN}$        | $[\text{CdL}^{\text{O}}\text{Cl}_2]_n\cdot n\text{H}_2\text{O}$                    |
|--------------------------------------------------|-------------------------------------------------------------|------------------------------------------------------------------------------------|
| Empirical formula                                | $\text{C}_{27}\text{H}_{28}\text{Cl}_2\text{N}_3\text{OZn}$ | $\text{C}_{25}\text{H}_{26}\text{CdCl}_2\text{N}_2\text{O}\cdot\text{H}_2\text{O}$ |
| Formula weight                                   | 546.79                                                      | 571.79                                                                             |
| Crystal system                                   | Orthorhombic                                                | Monoclinic                                                                         |
| Space group                                      | $P2_12_12_1$                                                | $P2_1$                                                                             |
| $a, \text{\AA}$                                  | 10.2980(5)                                                  | 6.9333 (3)                                                                         |
| $b, \text{\AA}$                                  | 14.6532(7)                                                  | 28.6315 (14)                                                                       |
| $c, \text{\AA}$                                  | 17.2961(9)                                                  | 12.6065 (7)                                                                        |
| $\beta, ^\circ$                                  |                                                             | 99.520 (2)                                                                         |
| $V, \text{\AA}^3$                                | 2610.0(2)                                                   | 2468.1 (2)                                                                         |
| $Z; d_{\text{calc}}, \text{g/cm}^3$              | 4, 1.392                                                    | 4, 1.539                                                                           |
| $\mu (\text{mm}^{-1})$                           | 1.170                                                       | 1.126                                                                              |
| Crystal size, mm                                 | 0.2 x 0.15 x 0.1                                            | 0.16 x 0.05 x 0.03                                                                 |
| Theta range for data collection ( $^\circ$ )     | 3.642 – 62.19                                               | 3.572 – 60.06                                                                      |
| Reflections collected                            | 39080                                                       | 40701                                                                              |
| Independent reflections<br>( $R_{\text{int}}$ )  | 7626<br>0.0578                                              | 12477<br>0.0485                                                                    |
| Number of reflections with $I > 2s(I)$           | 5839                                                        | 10189                                                                              |
| Number of refined parameters                     | 312                                                         | 591                                                                                |
| GOOF on $F^2$                                    | 0.997                                                       | 1.021                                                                              |
| Final $R$ indices ( $I > 2\sigma_i$ )            |                                                             |                                                                                    |
| $R_1$                                            | 0.0419                                                      | 0.0342                                                                             |
| $wR_2$                                           | 0.0857                                                      | 0.0732                                                                             |
| $R$ indices (all data)                           |                                                             |                                                                                    |
| $R_1$                                            | 0.0697                                                      | 0.0514                                                                             |
| $wR_2$                                           | 0.0941                                                      | 0.0776                                                                             |
| Largest diff. peak and hole ( $e/\text{\AA}^3$ ) | 0.88/ -0.49                                                 | 0.85/ -0.92                                                                        |
| Flack parameter                                  | 0.013(5)                                                    | -0.013(11)                                                                         |

**Table S2.** Selected bond lengths (Å) and angles (°) for [ZnL<sup>o</sup>Cl<sub>2</sub>]**·**MeCN.

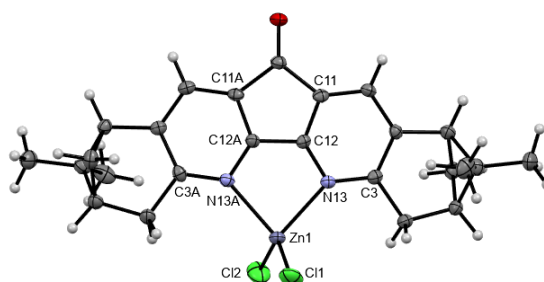

| Bond               | <i>d</i> (Å)    |
|--------------------|-----------------|
| Zn(1)–Cl(1)        | 2.180(1)        |
| Zn(1)–Cl(2)        | 2.190(1)        |
| Zn(1)–N(13)        | 2.138(3)        |
| Zn(1)–N(13A)       | 2.157(3)        |
| N(13)–C(12)        | 1.335(5)        |
| N(13)–C(3)         | 1.357(5)        |
| N(13A)–C(12A)      | 1.330(5)        |
| N(13)–C(3A)        | 1.344(5)        |
| C(11)–C(12)        | 1.389(5)        |
| C(12)–C(12a)       | 1.441(5)        |
| Angle              | $\omega$ (deg.) |
| Cl(1)–Zn(1)–Cl(2)  | 123.0(1)        |
| N(13)–Zn(1)–N(13A) | 84.2(1)         |
| N(13)–Zn(1)–Cl(1)  | 111.6(1)        |
| N(13)–Zn(1)–Cl(2)  | 111.6(1)        |
| N(13A)–Zn(1)–Cl(1) | 111.4(1)        |
| N(13A)–Zn(1)–Cl(2) | 105.5(1)        |

**Table S3.** Selected bond lengths (Å) and angles (°) for  $[\text{CdL}^{\text{O}}\text{Cl}_2]_n \cdot n\text{H}_2\text{O}$ .

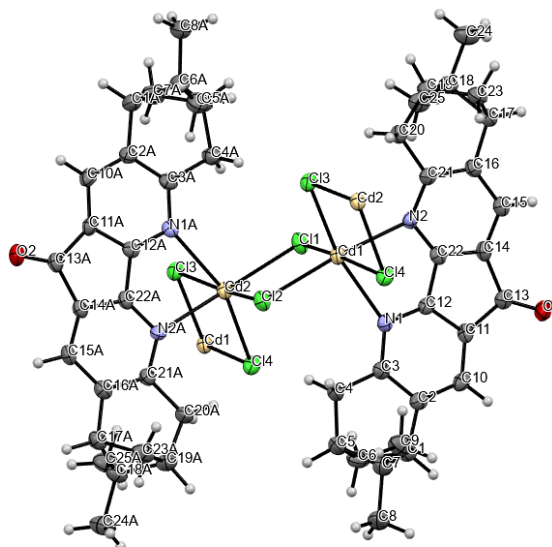

| Bond                         | $d$ (Å)         | Bond                          | $d$ (Å)         |
|------------------------------|-----------------|-------------------------------|-----------------|
| Cd(1)–Cl(1)                  | 2.602(1)        | Cd(2)–Cl(1)                   | 2.588(1)        |
| Cd(1)–Cl(2)                  | 2.570(1)        | Cd(2)–Cl(2)                   | 2.593(1)        |
| Cd(1)–Cl(3)                  | 2.564(1)        | Cd(2)–Cl(3) <sup>2</sup>      | 2.684(1)        |
| Cd(1)–Cl(4) <sup>1</sup>     | 2.675(1)        | Cd(2)–Cl(4)                   | 2.571(1)        |
| Cd(1)–N(1)                   | 2.441(4)        | Cd(2)–N(1A)                   | 2.426(4)        |
| Cd(1)–N(2)                   | 2.439(4)        | Cd(2)–N(2A)                   | 2.482(4)        |
| Angle                        | $\omega$ (deg.) | Angle                         | $\omega$ (deg.) |
| Cl(1)Cd(1)Cl(4) <sup>1</sup> | 172.1(1)        | Cl(1)Cd(2)Cl(4)               | 93.9(1)         |
| Cl(2)Cd(1)Cl(4) <sup>1</sup> | 96.4(1)         | Cl(2)Cd(2)Cl(4)               | 103.2(1)        |
| Cl(3)Cd(1)Cl(4) <sup>1</sup> | 85.7(1)         | Cl(3) <sup>2</sup> Cd(2)Cl(4) | 85.4(1)         |
| Cl(1)Cd(1)Cl(2)              | 86.0(1)         | Cl(1)Cd(2)Cl(2)               | 85.9(1)         |
| Cl(1)Cd(1)Cl(3)              | 101.8(1)        | Cl(1)Cd(2)Cl(3) <sup>2</sup>  | 97.5(1)         |
| Cl(2)Cd(1)Cl(3)              | 91.2(1)         | Cl(2)Cd(2)Cl(3) <sup>2</sup>  | 170.7(1)        |
| N(1)Cd(1)Cl(1)               | 93.8(1)         | N(1A)Cd(2)Cl(1)               | 102.3(1)        |
| N(1)Cd(1)Cl(2)               | 97.7(1)         | N(1A)Cd(2)Cl(2)               | 94.7(1)         |
| N(1)Cd(1)Cl(4) <sup>1</sup>  | 78.4(1)         | N(1A)Cd(2)Cl(4)               | 156.7(1)        |
| N(1)Cd(1)Cl(3)               | 162.6(1)        | N(1A)Cd(2)Cl(3) <sup>2</sup>  | 76.1(1)         |
| N(2)Cd(1)Cl(1)               | 88.1(1)         | N(2A)Cd(2)Cl(1)               | 166.5(1)        |
| N(2)Cd(1)Cl(2)               | 170.9(1)        | N(2A)Cd(2)Cl(2)               | 81.2(1)         |
| N(2)Cd(1)Cl(4) <sup>1</sup>  | 88.6(1)         | N(2A)Cd(2)Cl(4)               | 93.1(1)         |
| N(2)Cd(1)Cl(3)               | 96.9(1)         | N(2A)Cd(2)Cl(3) <sup>2</sup>  | 94.7(1)         |
| N(1)Cd(1)N(2)                | 75.8(1)         | N(1A)Cd(2)N(2A)               | 74.8(1)         |

<sup>1</sup> -1+X,+Y,+Z, <sup>2</sup> 1+X,+Y,+Z

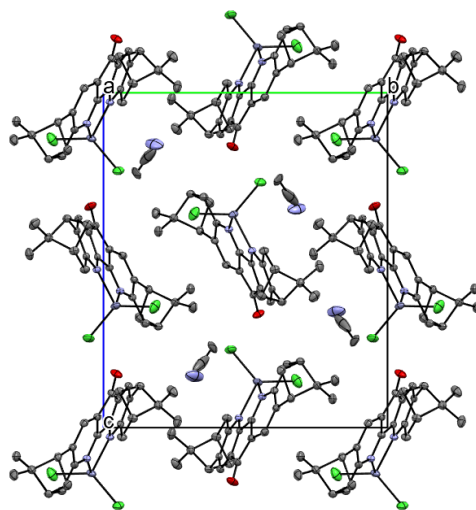

**Figure S1.** Packing diagram of  $[\text{ZnL}^{\text{O}}\text{Cl}_2]\cdot\text{MeCN}$ , view along the  $a$  axis.

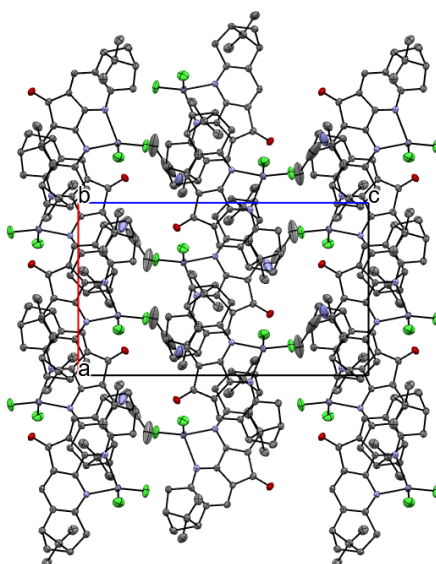

**Figure S2.** Packing diagram of  $[\text{ZnL}^{\text{O}}\text{Cl}_2]\cdot\text{MeCN}$ , view along the  $b$  axis.

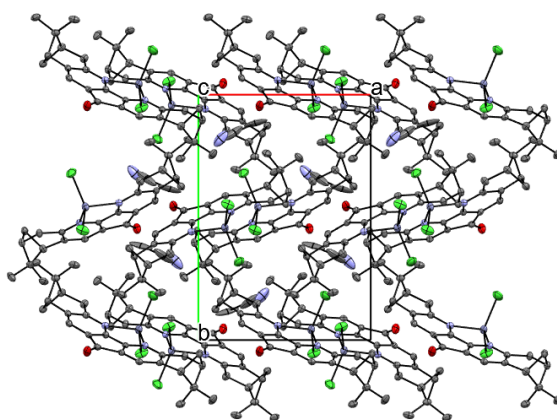

**Figure S3.** Packing diagram of  $[\text{ZnL}^{\text{O}}\text{Cl}_2]\cdot\text{MeCN}$ , view along the  $c$  axis.

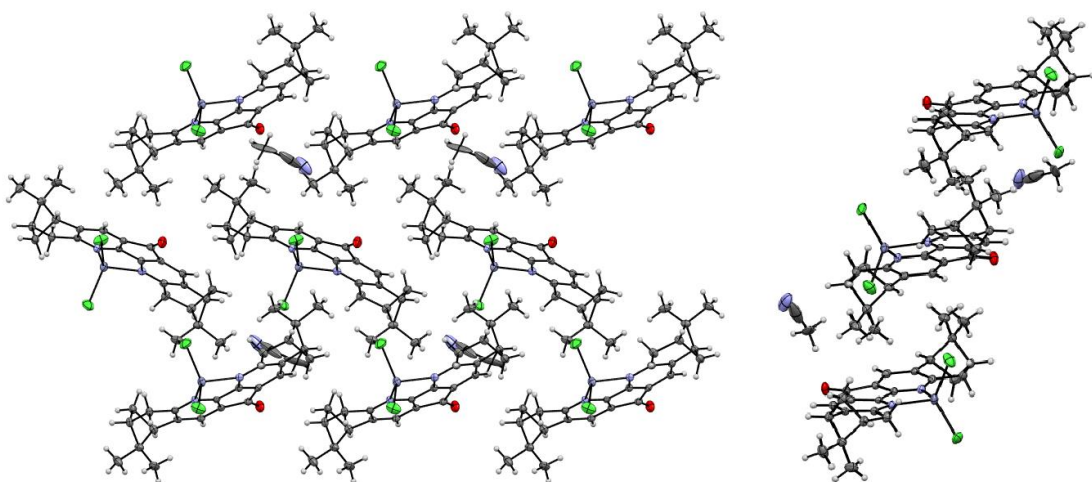

**Figure S4.** A 2D supramolecular layer in the structure of  $[\text{ZnL}^{\text{O}}\text{Cl}_2]\cdot\text{MeCN}$  (frontal view and side view).

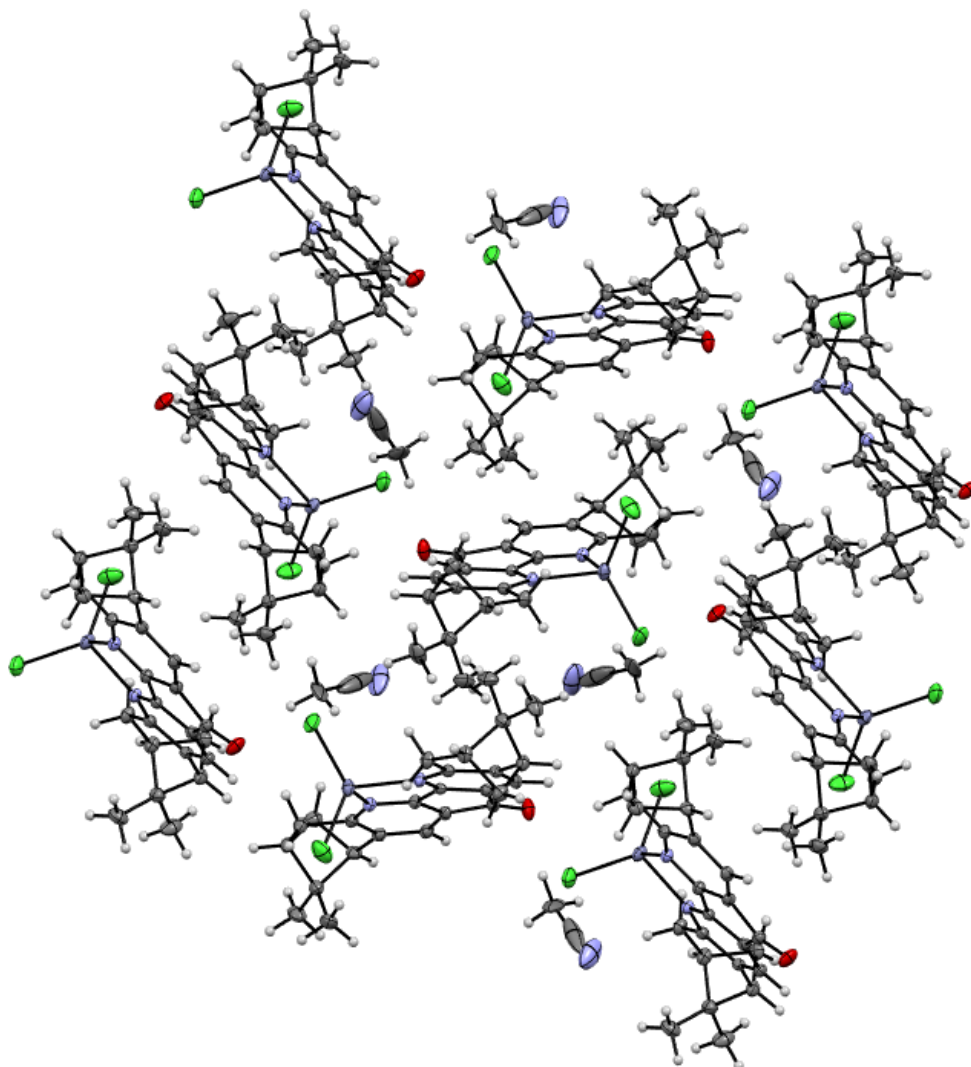

**Figure S5.** Packing of 2D supramolecular layers in the structure of  $[\text{ZnL}^{\text{O}}\text{Cl}_2]\cdot\text{MeCN}$  (side view).

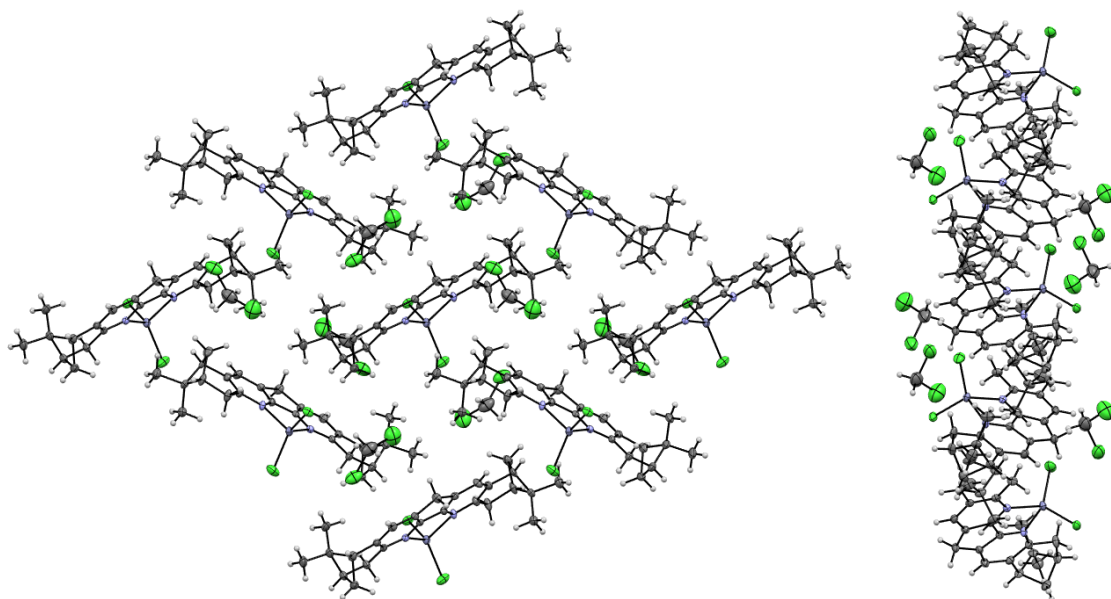

**Figure S6.** A 2D supramolecular layer in the structure of  $[\text{ZnLCl}_2] \cdot \text{CH}_2\text{Cl}_2$  (frontal view and side view).

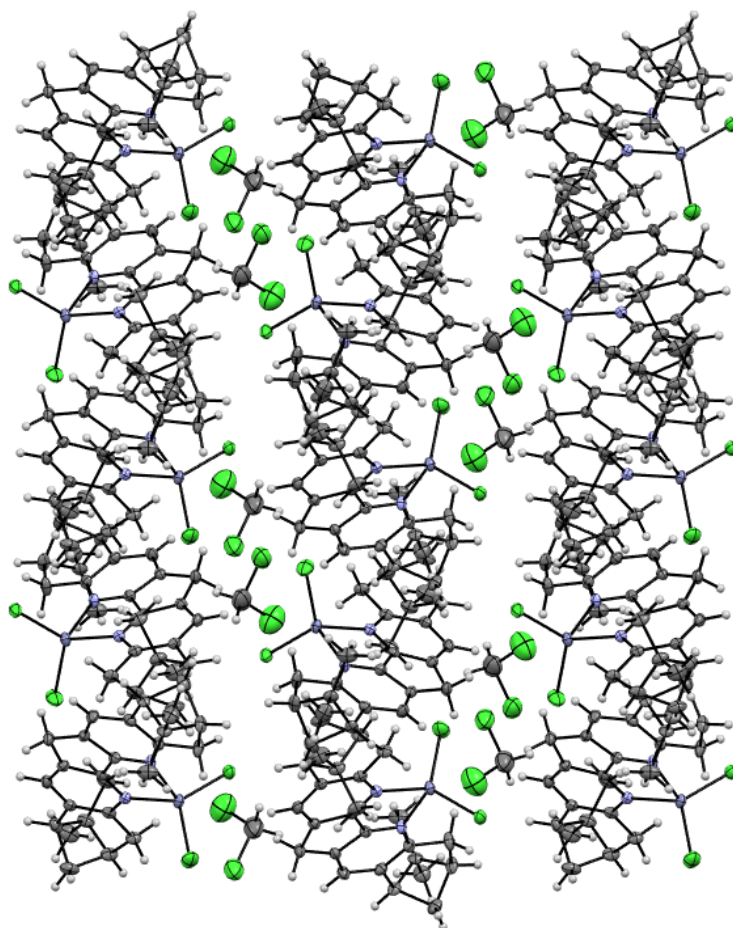

**Figure S7.** Packing of 2D supramolecular layers in the structure of  $[\text{ZnLCl}_2] \cdot \text{CH}_2\text{Cl}_2$  (side view).



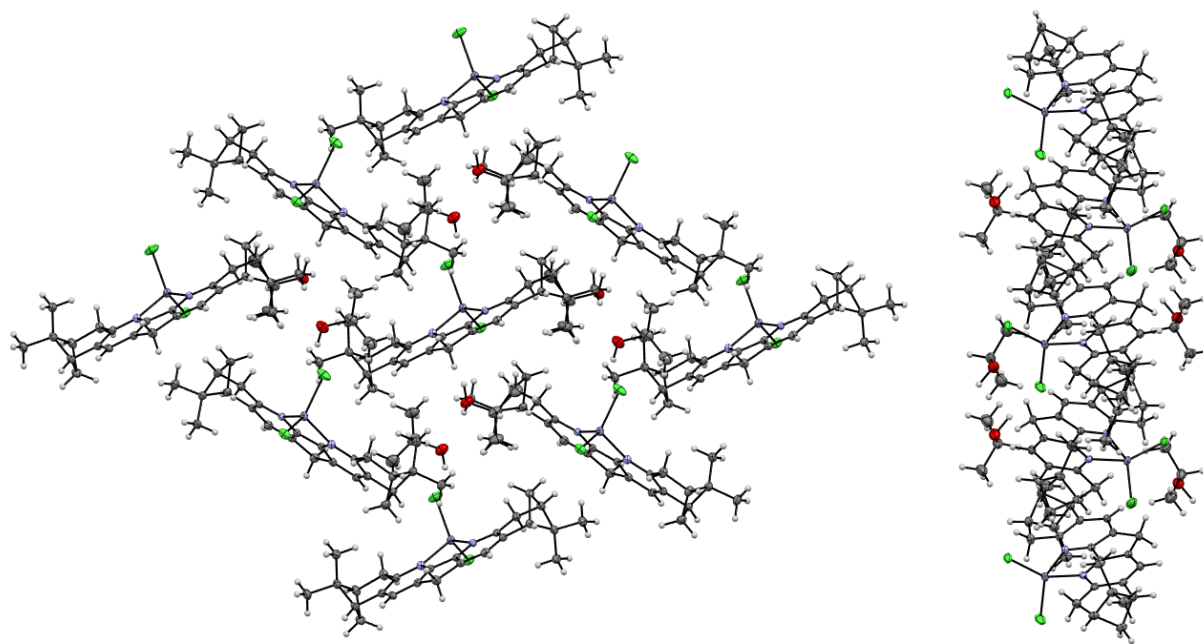

**Figure S8.** A 2D supramolecular layer in the structure of  $[\text{ZnLCl}_2] \cdot i\text{PrOH}$  (frontal view and side view)

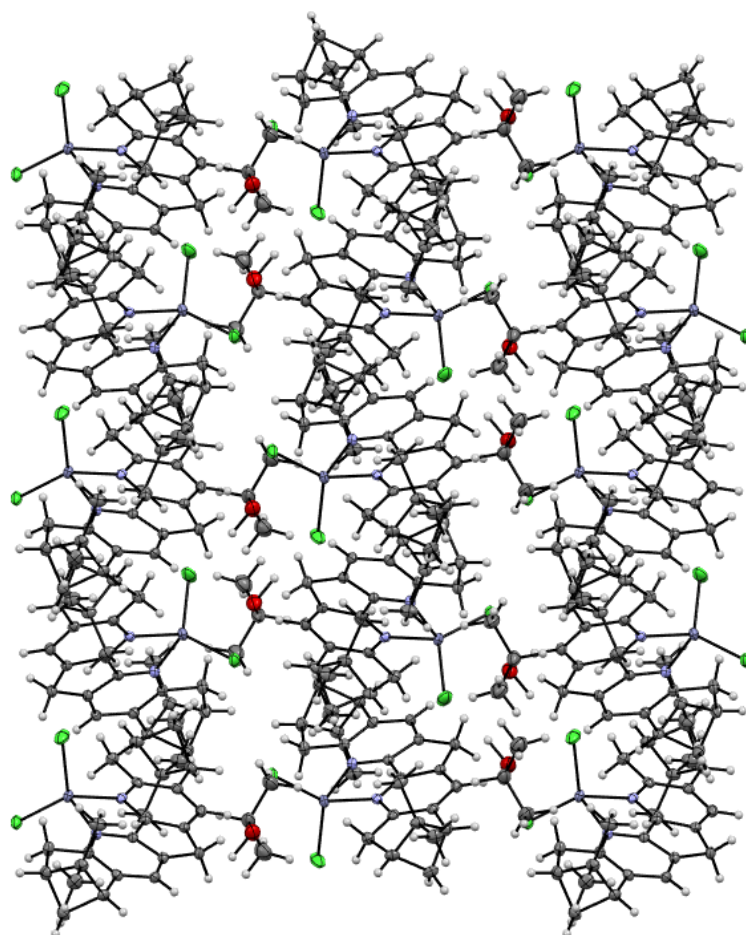

**Figure S9.** Packing of 2D supramolecular layers in the structure of  $[\text{ZnLCl}_2] \cdot i\text{PrOH}$  (side view).

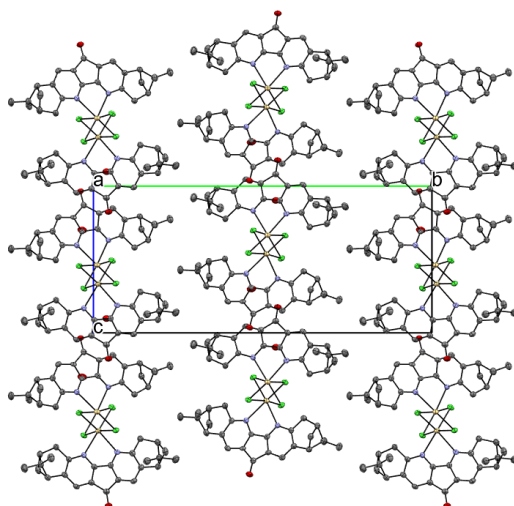

**Figure S10.** Packing diagram of  $[\text{CdL}^{\text{O}}\text{Cl}_2]_n \cdot n\text{H}_2\text{O}$ , view along the  $a$  axis.

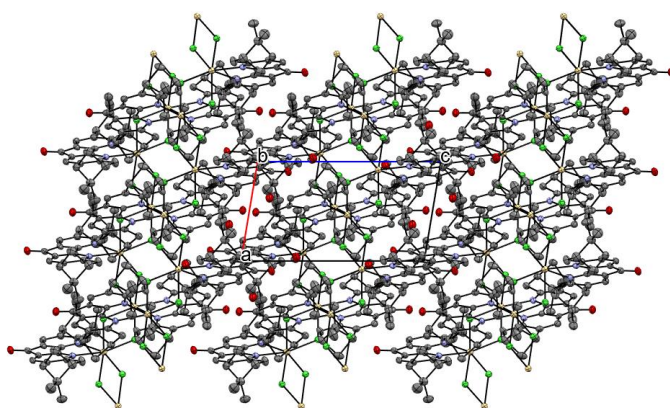

**Figure S11.** Packing diagram of  $[\text{CdL}^{\text{O}}\text{Cl}_2]_n \cdot n\text{H}_2\text{O}$ , view along the  $b$  axis.

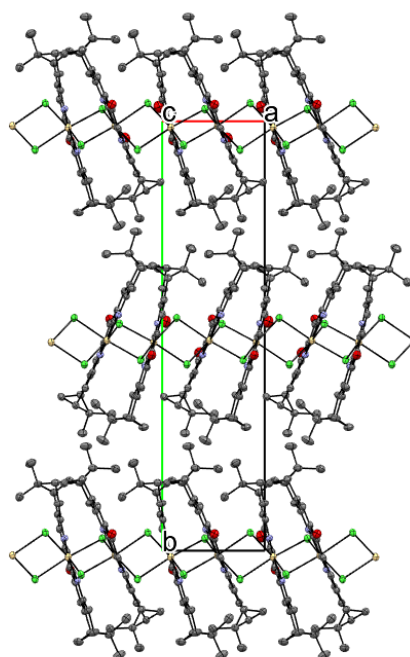

**Figure S12.** Packing diagram of  $[\text{CdL}^{\text{O}}\text{Cl}_2]_n \cdot n\text{H}_2\text{O}$ , view along the  $c$  axis.

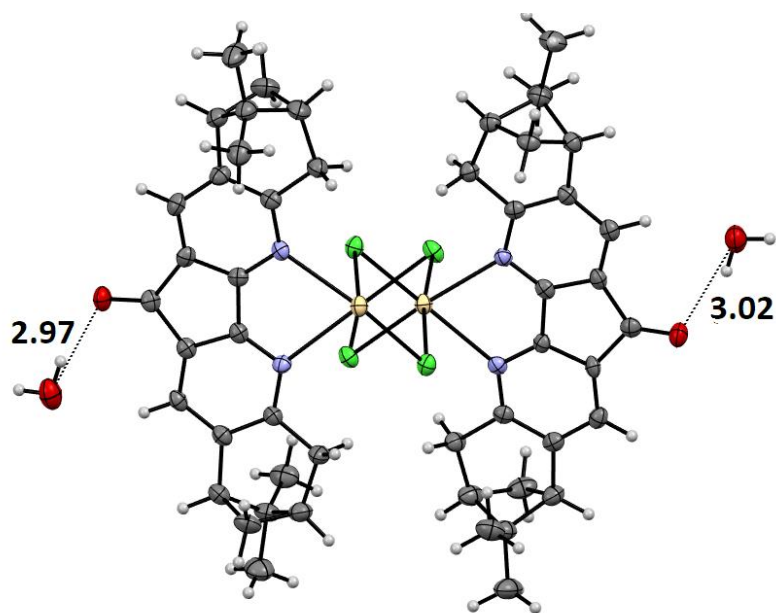

**Figure S13.** Hydrogen bonds between the H<sub>2</sub>O molecules and 1D polymeric chain in the structure of [CdL<sup>o</sup>Cl<sub>2</sub>]<sub>n</sub>·nH<sub>2</sub>O.

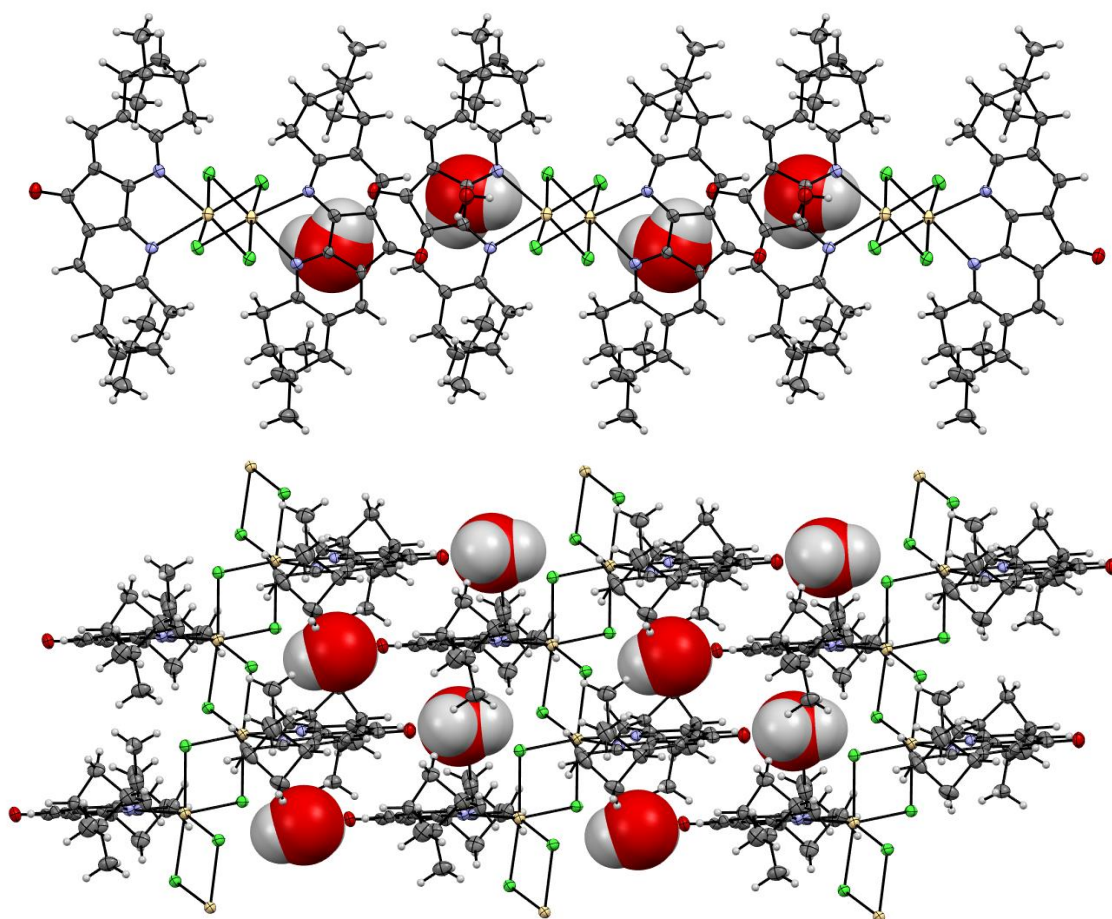

**Figure S14.** The H<sub>2</sub>O molecules between the 1D polymeric chain in the structure of [CdL<sup>o</sup>Cl<sub>2</sub>]<sub>n</sub>·nH<sub>2</sub>O.

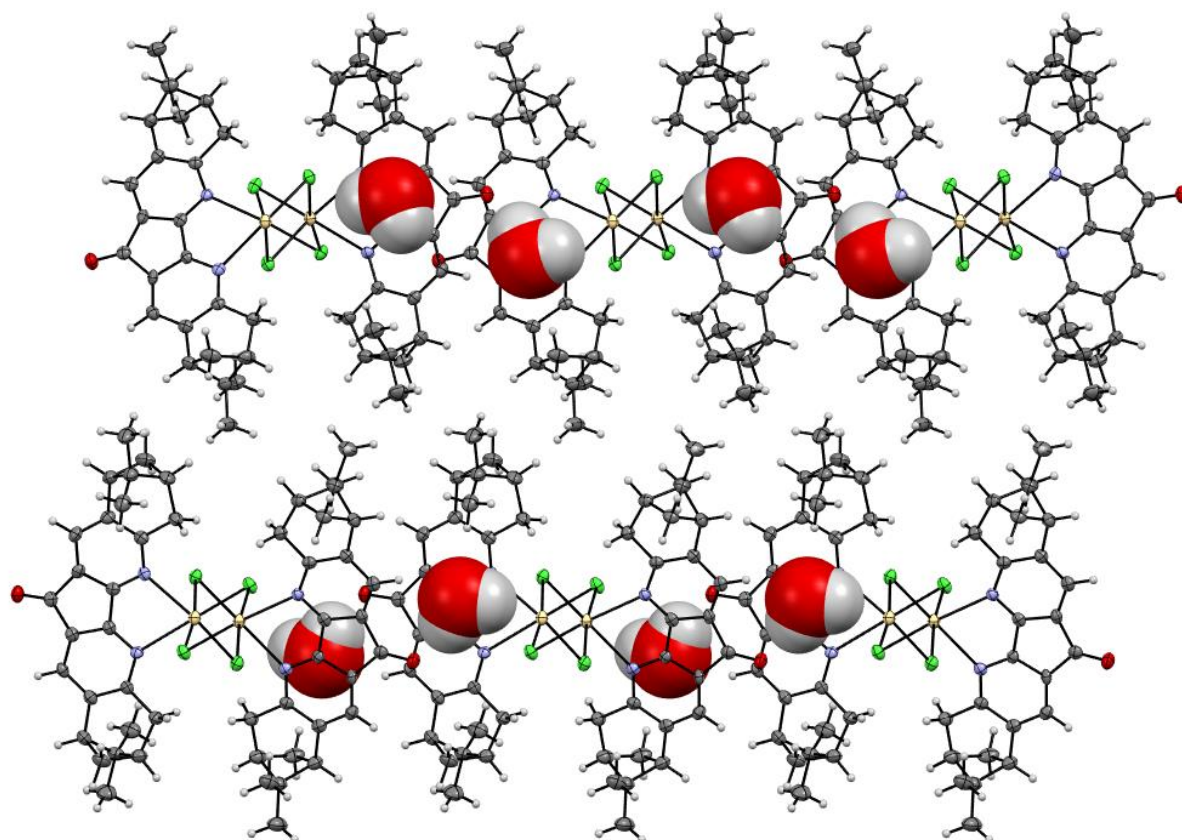

**Figure S15.** The packing of supramolecular layers in the structure of  $[\text{CdLCl}_2]_n \cdot n\text{H}_2\text{O}$  (two layers are shown).

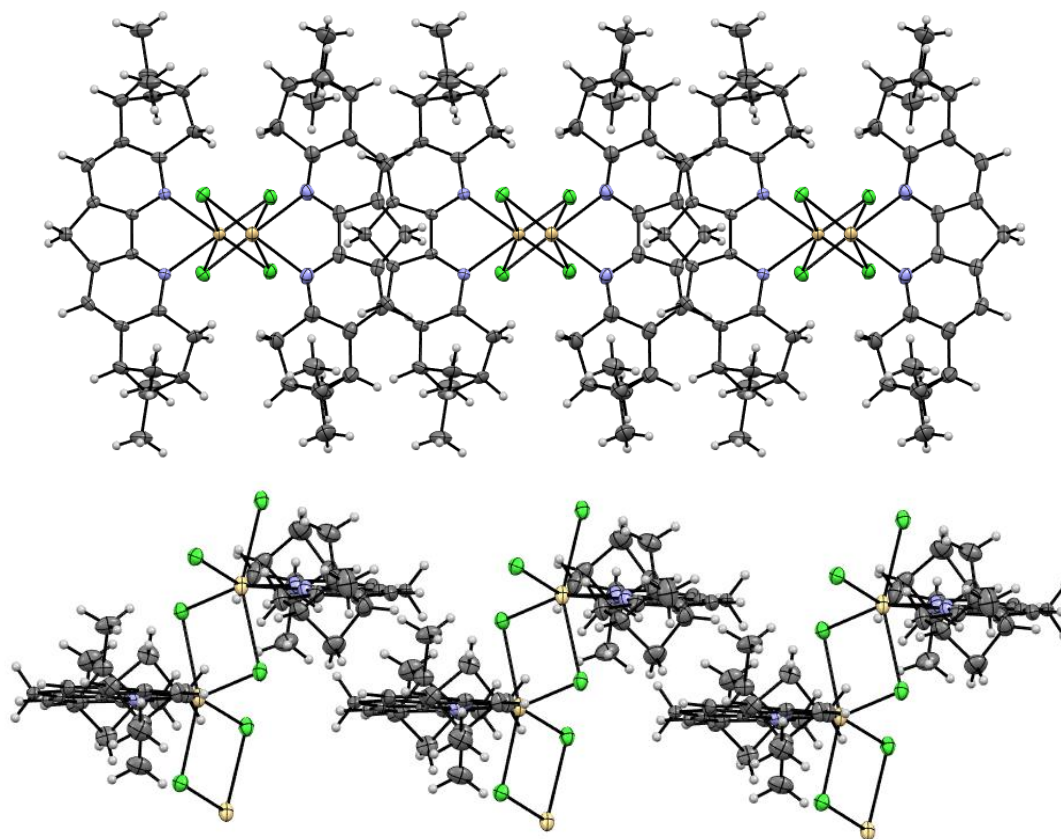

**Figure S16.** The packing of 1D supramolecular chains in the structure of  $[\text{CdLCl}_2]_n$ .

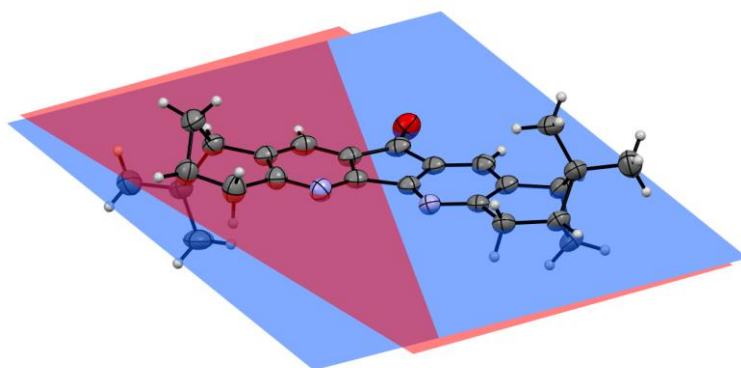

**Figure S17.** The angle between the planes of two pyridine moieties ( $6.02^\circ$ ) in the structure of  $L^0$ .

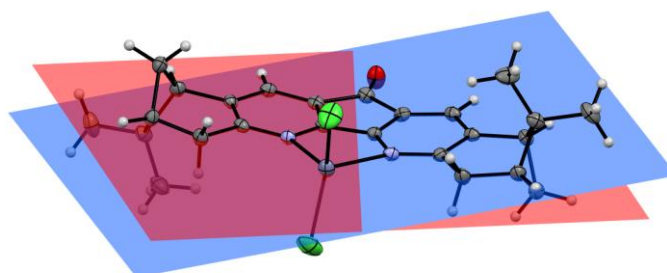

**Figure S18.** The angle between the planes of two pyridine moieties ( $8.77^\circ$ ) in the structure of  $[Zn^0Cl_2] \cdot MeCN$ .

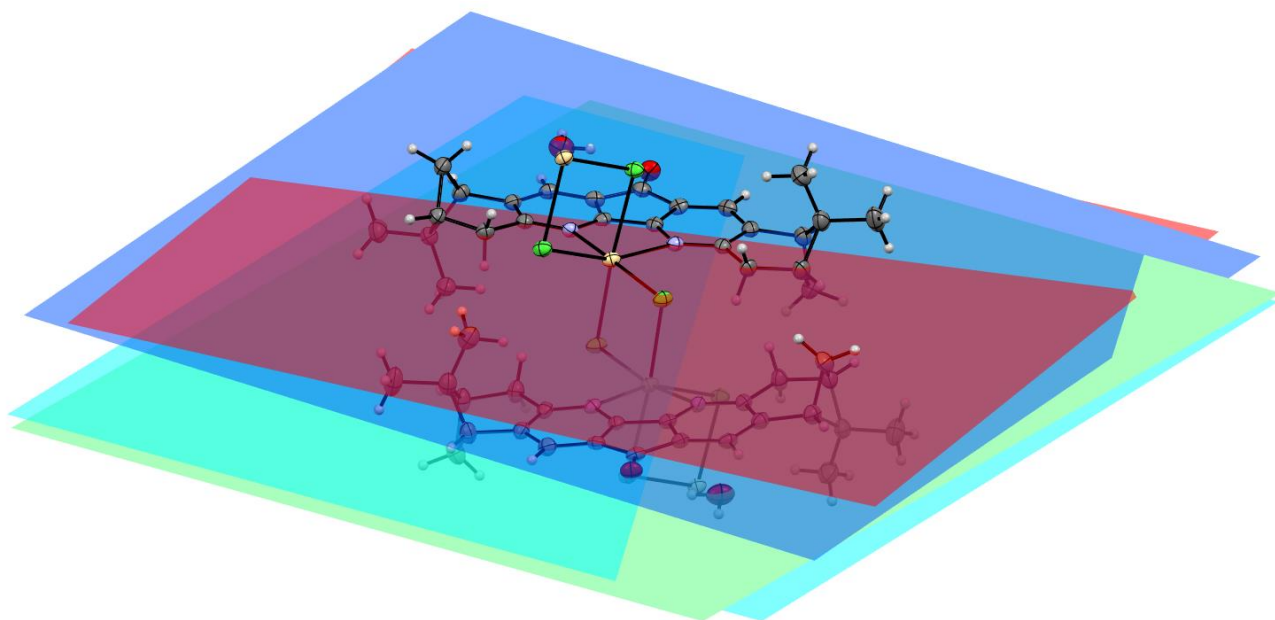

**Figure S19.** The angles between the planes of the pyridine moieties ( $3.62$  and  $4.17^\circ$ ) in the structure of  $[CdL^0Cl_2]_n \cdot nH_2O$ .

## Thermogravimetric analysis

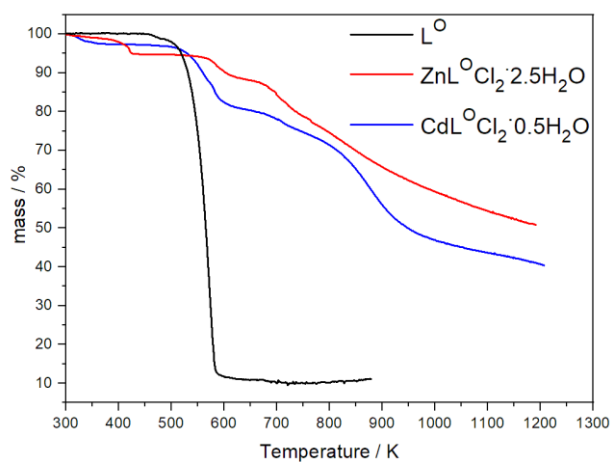

**Figure S20.** TGA data for  $L^0$ ,  $ZnL^0Cl_2 \cdot 2.5H_2O$  and  $CdL^0Cl_2 \cdot 0.5H_2O$ .

## IR spectroscopy

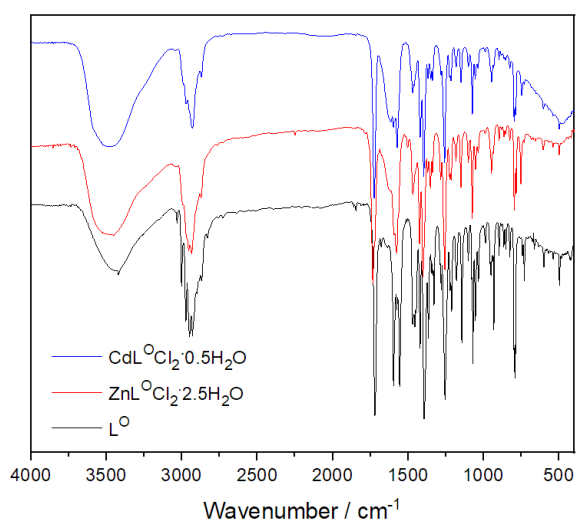

**Figure S21.** IR spectra of  $L^0$ ,  $ZnL^0Cl_2 \cdot 2.5H_2O$  and  $CdL^0Cl_2 \cdot 0.5H_2O$  in KBr in the 4000 – 400  $cm^{-1}$  range.

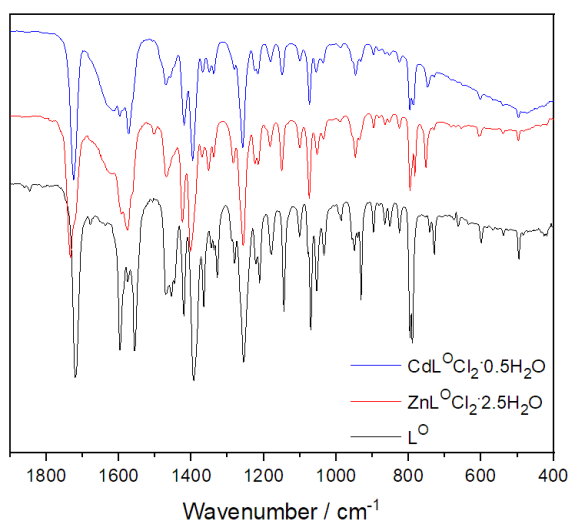

**Figure S22.** IR spectra of  $L^0$ ,  $ZnL^0Cl_2 \cdot 2.5H_2O$  and  $CdL^0Cl_2 \cdot 0.5H_2O$  in KBr in the 1900 – 400  $cm^{-1}$  range.

**Table S4.** Main vibrational frequencies ( $\text{cm}^{-1}$ ) in the IR spectra of  $\text{L}^{\text{O}}$ ,  $\text{ZnL}^{\text{O}}\text{Cl}_2 \cdot 2.5\text{H}_2\text{O}$  and  $\text{CdL}^{\text{O}}\text{Cl}_2 \cdot 0.5\text{H}_2\text{O}$ .

| Compound                                                       | aromatic<br>$\nu(\text{C-H})$ | aliphatic $\nu(\text{C-H})$           | $\nu(\text{C=O})$ | $\nu(\text{C=N})$   | $\nu(\text{C=O})$         |
|----------------------------------------------------------------|-------------------------------|---------------------------------------|-------------------|---------------------|---------------------------|
| $\text{L}^{\text{O}}$                                          | 3031, 3002                    | 2971, 2948, 2927, 2900,<br>2868, 2828 | 1720              | 1597, 1576,<br>1559 | 1470, 1455,<br>1446, 1421 |
| $\text{ZnL}^{\text{O}}\text{Cl}_2 \cdot 2.5\text{H}_2\text{O}$ | 3037, 2996                    | 2969, 2954, 2934, 2872                | 1733              | 1617, 1594,<br>1577 | 1469, 1458, 1447,<br>1424 |
| $\text{CdL}^{\text{O}}\text{Cl}_2 \cdot 0.5\text{H}_2\text{O}$ | 3042, 2992                    | 2973, 2950, 2928, 2868                | 1725              | 1617, 1597,<br>1572 | 1470, 1457, 1446,<br>1420 |

## Theoretical part

**Table S5.** Optimized geometry of the **ground state** of **L** in Cartesian (XYZ) coordinates as calculated in Gaussian at the B3LYP/6-31+g(d) level of theory.

|   |                 |                 |                 |
|---|-----------------|-----------------|-----------------|
| C | 1.533888000000  | 5.235059000000  | -0.355896000000 |
| H | 1.679093000000  | 4.163737000000  | -0.512152000000 |
| H | 2.073617000000  | 5.509892000000  | 0.559560000000  |
| H | 2.014763000000  | 5.764007000000  | -1.188806000000 |
| C | 0.061896000000  | 5.641610000000  | -0.248356000000 |
| C | -0.887984000000 | 4.836650000000  | 0.727168000000  |
| H | -0.974038000000 | 5.184774000000  | 1.762888000000  |
| C | -0.597873000000 | 3.358095000000  | 0.638484000000  |
| C | -0.442313000000 | 2.510338000000  | 1.736995000000  |
| H | -0.510704000000 | 2.904347000000  | 2.749811000000  |
| C | -0.204926000000 | 1.162936000000  | 1.492004000000  |
| C | 0.000000000000  | 0.000000000000  | 2.440342000000  |
| H | 0.866734000000  | 0.152472000000  | 3.098786000000  |
| C | 0.000000000000  | 7.155402000000  | 0.009440000000  |
| H | -1.019893000000 | 7.538991000000  | 0.103849000000  |
| H | 0.482022000000  | 7.700212000000  | -0.812195000000 |
| H | 0.536067000000  | 7.410132000000  | 0.932364000000  |
| C | -2.045953000000 | 5.140292000000  | -0.273706000000 |
| H | -2.821112000000 | 4.373323000000  | -0.373418000000 |
| H | -2.523150000000 | 6.106222000000  | -0.096692000000 |
| C | -0.945567000000 | 5.190094000000  | -1.370318000000 |
| H | -1.087782000000 | 5.870836000000  | -2.217854000000 |
| C | -0.656546000000 | 3.755145000000  | -1.845901000000 |
| H | -1.472645000000 | 3.397087000000  | -2.487532000000 |
| H | 0.251737000000  | 3.713418000000  | -2.461303000000 |
| C | -0.502816000000 | 2.809693000000  | -0.663488000000 |
| N | -0.271350000000 | 1.517065000000  | -0.913217000000 |
| C | -0.129279000000 | 0.725748000000  | 0.155939000000  |
| C | -1.533888000000 | -5.235059000000 | -0.355896000000 |
| H | -1.679093000000 | -4.163737000000 | -0.512152000000 |
| H | -2.073617000000 | -5.509892000000 | 0.559560000000  |
| H | -2.014763000000 | -5.764007000000 | -1.188806000000 |
| C | -0.061896000000 | -5.641610000000 | -0.248356000000 |
| C | 0.887984000000  | -4.836650000000 | 0.727168000000  |
| H | 0.974038000000  | -5.184774000000 | 1.762888000000  |
| C | 0.597873000000  | -3.358095000000 | 0.638484000000  |
| C | 0.442313000000  | -2.510338000000 | 1.736995000000  |
| H | 0.510704000000  | -2.904347000000 | 2.749811000000  |
| C | 0.204926000000  | -1.162936000000 | 1.492004000000  |
| H | -0.866734000000 | -0.152472000000 | 3.098786000000  |
| C | 0.000000000000  | -7.155402000000 | 0.009440000000  |
| H | 1.019893000000  | -7.538991000000 | 0.103849000000  |
| H | -0.482022000000 | -7.700212000000 | -0.812195000000 |
| H | -0.536067000000 | -7.410132000000 | 0.932364000000  |
| C | 2.045953000000  | -5.140292000000 | -0.273706000000 |
| H | 2.821112000000  | -4.373323000000 | -0.373418000000 |
| H | 2.523150000000  | -6.106222000000 | -0.096692000000 |
| C | 0.945567000000  | -5.190094000000 | -1.370318000000 |



|   |                 |                 |                 |
|---|-----------------|-----------------|-----------------|
| H | 1.087782000000  | -5.870836000000 | -2.217854000000 |
| C | 0.656546000000  | -3.755145000000 | -1.845901000000 |
| H | 1.472645000000  | -3.397087000000 | -2.487532000000 |
| H | -0.251737000000 | -3.713418000000 | -2.461303000000 |
| C | 0.502816000000  | -2.809693000000 | -0.663488000000 |
| N | 0.271350000000  | -1.517065000000 | -0.913217000000 |
| C | 0.129279000000  | -0.725748000000 | 0.155939000000  |

**Table S6.** Optimized geometry of the **first singlet excited state** of **L** in Cartesian (XYZ) coordinates as calculated in Gaussian at the B3LYP/6-31+g(d) level of theory.

|   |                 |                 |                 |
|---|-----------------|-----------------|-----------------|
| C | 1.531796000000  | 5.213966000000  | -0.336031000000 |
| H | 1.670467000000  | 4.142282000000  | -0.496738000000 |
| H | 2.059492000000  | 5.478167000000  | 0.589430000000  |
| H | 2.028077000000  | 5.746554000000  | -1.157671000000 |
| C | 0.061465000000  | 5.628454000000  | -0.247190000000 |
| C | -0.905785000000 | 4.810575000000  | 0.722910000000  |
| H | -1.002144000000 | 5.164009000000  | 1.755701000000  |
| C | -0.617042000000 | 3.345862000000  | 0.639369000000  |
| C | -0.450577000000 | 2.494449000000  | 1.763701000000  |
| H | -0.524552000000 | 2.889878000000  | 2.774099000000  |
| C | -0.204623000000 | 1.163874000000  | 1.508230000000  |
| C | 0.000000000000  | 0.000000000000  | 2.458338000000  |
| H | 0.866412000000  | 0.151547000000  | 3.117369000000  |
| C | 0.000000000000  | 7.138630000000  | 0.024736000000  |
| H | -1.019488000000 | 7.525439000000  | 0.108750000000  |
| H | 0.494364000000  | 7.688501000000  | -0.786779000000 |
| H | 0.526190000000  | 7.383887000000  | 0.955737000000  |
| C | -2.050018000000 | 5.133534000000  | -0.297672000000 |
| H | -2.829110000000 | 4.373143000000  | -0.412370000000 |
| H | -2.520893000000 | 6.101775000000  | -0.112108000000 |
| C | -0.936112000000 | 5.182281000000  | -1.377138000000 |
| H | -1.065424000000 | 5.862312000000  | -2.227543000000 |
| C | -0.649962000000 | 3.746112000000  | -1.846151000000 |
| H | -1.463593000000 | 3.388351000000  | -2.493005000000 |
| H | 0.259591000000  | 3.691609000000  | -2.459911000000 |
| C | -0.505845000000 | 2.789515000000  | -0.675417000000 |
| N | -0.260323000000 | 1.509459000000  | -0.953542000000 |
| C | -0.120770000000 | 0.700677000000  | 0.144792000000  |
| C | -1.531796000000 | -5.213966000000 | -0.336031000000 |
| H | -1.670467000000 | -4.142282000000 | -0.496738000000 |
| H | -2.059492000000 | -5.478167000000 | 0.589430000000  |
| H | -2.028077000000 | -5.746554000000 | -1.157671000000 |
| C | -0.061465000000 | -5.628454000000 | -0.247190000000 |
| C | 0.905785000000  | -4.810575000000 | 0.722910000000  |
| H | 1.002144000000  | -5.164009000000 | 1.755701000000  |
| C | 0.617042000000  | -3.345862000000 | 0.639369000000  |
| C | 0.450577000000  | -2.494449000000 | 1.763701000000  |
| H | 0.524552000000  | -2.889878000000 | 2.774099000000  |
| C | 0.204623000000  | -1.163874000000 | 1.508230000000  |
| H | -0.866412000000 | -0.151547000000 | 3.117369000000  |
| C | 0.000000000000  | -7.138630000000 | 0.024736000000  |
| H | 1.019488000000  | -7.525439000000 | 0.108750000000  |

|   |                 |                 |                 |
|---|-----------------|-----------------|-----------------|
| H | -0.494364000000 | -7.688501000000 | -0.786779000000 |
| H | -0.526190000000 | -7.383887000000 | 0.955737000000  |
| C | 2.050018000000  | -5.133534000000 | -0.297672000000 |
| H | 2.829110000000  | -4.373143000000 | -0.412370000000 |
| H | 2.520893000000  | -6.101775000000 | -0.112108000000 |
| C | 0.936112000000  | -5.182281000000 | -1.377138000000 |
| H | 1.065424000000  | -5.862312000000 | -2.227543000000 |
| C | 0.649962000000  | -3.746112000000 | -1.846151000000 |
| H | 1.463593000000  | -3.388351000000 | -2.493005000000 |
| H | -0.259591000000 | -3.691609000000 | -2.459911000000 |
| C | 0.505845000000  | -2.789515000000 | -0.675417000000 |
| N | 0.260323000000  | -1.509459000000 | -0.953542000000 |
| C | 0.120770000000  | -0.700677000000 | 0.144792000000  |

**Table S7.** Optimized geometry of the **ground state** of **L<sup>0</sup>** in Cartesian (XYZ) coordinates as calculated in Gaussian at the B3LYP/6-31+g(d) level of theory.

|   |                 |                 |                 |
|---|-----------------|-----------------|-----------------|
| N | 1.543141000000  | -1.047981000000 | -0.152652000000 |
| C | 0.741953000000  | 0.010781000000  | -0.074156000000 |
| O | -0.000017000000 | 3.478020000000  | -0.000096000000 |
| N | -1.543182000000 | -1.047962000000 | 0.152951000000  |
| C | 1.180553000000  | 1.346848000000  | -0.118264000000 |
| C | -3.400293000000 | 0.525185000000  | 0.344744000000  |
| C | -0.741966000000 | 0.010798000000  | 0.074369000000  |
| C | -2.534260000000 | 1.618463000000  | 0.254545000000  |
| H | -2.901685000000 | 2.641444000000  | 0.291857000000  |
| C | 3.400258000000  | 0.525114000000  | -0.344791000000 |
| C | 2.534246000000  | 1.618422000000  | -0.254597000000 |
| H | 2.901701000000  | 2.641388000000  | -0.292024000000 |
| C | 2.854499000000  | -0.779772000000 | -0.286079000000 |
| C | -4.895734000000 | 0.621885000000  | 0.524996000000  |
| H | -5.241206000000 | 1.659402000000  | 0.589958000000  |
| C | 5.264487000000  | -1.473999000000 | -0.546128000000 |
| H | 5.956508000000  | -2.319417000000 | -0.634134000000 |
| C | 0.000003000000  | 2.259396000000  | 0.000026000000  |
| C | -2.854525000000 | -0.779731000000 | 0.286301000000  |
| C | 4.895694000000  | 0.621801000000  | -0.525165000000 |
| H | 5.241137000000  | 1.659319000000  | -0.590294000000 |
| C | -5.633677000000 | -0.344953000000 | -0.486322000000 |
| C | -1.180554000000 | 1.346854000000  | 0.118330000000  |
| C | 3.814260000000  | -1.955003000000 | -0.361407000000 |
| H | 3.517570000000  | -2.602957000000 | -1.197009000000 |
| H | 3.703682000000  | -2.564757000000 | 0.545007000000  |
| C | -5.288865000000 | -0.382574000000 | 1.652366000000  |
| H | -4.582351000000 | -0.490540000000 | 2.481998000000  |
| H | -6.285951000000 | -0.201147000000 | 2.057488000000  |
| C | -5.264563000000 | -1.473910000000 | 0.546188000000  |
| H | -5.956574000000 | -2.319334000000 | 0.634227000000  |
| C | 5.633728000000  | -0.344893000000 | 0.486201000000  |
| C | -5.120165000000 | -0.449812000000 | -1.924649000000 |
| H | -4.042197000000 | -0.614406000000 | -1.993192000000 |
| H | -5.346941000000 | 0.469813000000  | -2.478890000000 |
| H | -5.618412000000 | -1.276707000000 | -2.446677000000 |

|   |                 |                 |                 |
|---|-----------------|-----------------|-----------------|
| C | 5.120409000000  | -0.449473000000 | 1.924620000000  |
| H | 4.042504000000  | -0.614375000000 | 1.993355000000  |
| H | 5.346967000000  | 0.470410000000  | 2.478525000000  |
| H | 5.618968000000  | -1.276034000000 | 2.446877000000  |
| C | 7.146108000000  | -0.075896000000 | 0.535155000000  |
| H | 7.605092000000  | 0.013502000000  | -0.453537000000 |
| H | 7.658330000000  | -0.889536000000 | 1.063794000000  |
| H | 7.352822000000  | 0.853041000000  | 1.081021000000  |
| C | -3.814311000000 | -1.954941000000 | 0.361637000000  |
| H | -3.703641000000 | -2.564799000000 | -0.544698000000 |
| H | -3.517709000000 | -2.602794000000 | 1.197346000000  |
| C | 5.288736000000  | -0.382789000000 | -1.652436000000 |
| H | 4.582168000000  | -0.490826000000 | -2.482013000000 |
| H | 6.285814000000  | -0.201438000000 | -2.057625000000 |
| C | -7.146045000000 | -0.075925000000 | -0.535510000000 |
| H | -7.605145000000 | 0.013691000000  | 0.453104000000  |
| H | -7.658231000000 | -0.889660000000 | -1.064042000000 |
| H | -7.352652000000 | 0.852903000000  | -1.081599000000 |

**Table S8.** Optimized geometry of the **first singlet excited state** of  $L^0$  in Cartesian (XYZ) coordinates as calculated in Gaussian at the B3LYP/6-31+g(d) level of theory.

|   |                 |                 |                 |
|---|-----------------|-----------------|-----------------|
| N | 1.536293000000  | -1.095523000000 | -0.152702000000 |
| C | 0.703695000000  | -0.028499000000 | -0.071119000000 |
| O | 0.000005000000  | 3.524349000000  | 0.000040000000  |
| N | -1.536291000000 | -1.095527000000 | 0.152595000000  |
| C | 1.142619000000  | 1.362815000000  | -0.115673000000 |
| C | -3.362044000000 | 0.532634000000  | 0.348340000000  |
| C | -0.703696000000 | -0.028501000000 | 0.071000000000  |
| C | -2.506881000000 | 1.619941000000  | 0.256220000000  |
| H | -2.874915000000 | 2.641996000000  | 0.296142000000  |
| C | 3.362053000000  | 0.532642000000  | -0.348341000000 |
| C | 2.506887000000  | 1.619947000000  | -0.256225000000 |
| H | 2.874922000000  | 2.642003000000  | -0.296113000000 |
| C | 2.817285000000  | -0.821384000000 | -0.286623000000 |
| C | -4.843055000000 | 0.629284000000  | 0.529340000000  |
| H | -5.188702000000 | 1.665609000000  | 0.598382000000  |
| C | 5.243736000000  | -1.469141000000 | -0.543538000000 |
| H | 5.950400000000  | -2.302290000000 | -0.629554000000 |
| C | -0.000003000000 | 2.269796000000  | -0.000049000000 |
| C | -2.817278000000 | -0.821391000000 | 0.286568000000  |
| C | 4.843071000000  | 0.629298000000  | -0.529283000000 |
| H | 5.188720000000  | 1.665625000000  | -0.598283000000 |
| C | -5.591063000000 | -0.335839000000 | -0.488241000000 |
| C | -1.142618000000 | 1.362811000000  | 0.115612000000  |
| C | 3.803596000000  | -1.974318000000 | -0.362560000000 |
| H | 3.523212000000  | -2.624393000000 | -1.202498000000 |
| H | 3.701888000000  | -2.591371000000 | 0.539842000000  |
| C | -5.246510000000 | -0.384125000000 | 1.652794000000  |
| H | -4.541821000000 | -0.507979000000 | 2.481639000000  |
| H | -6.237650000000 | -0.175978000000 | 2.059690000000  |
| C | -5.243720000000 | -1.469155000000 | 0.543551000000  |
| H | -5.950381000000 | -2.302306000000 | 0.629571000000  |

|   |                 |                 |                 |
|---|-----------------|-----------------|-----------------|
| C | 5.591042000000  | -0.335853000000 | 0.488297000000  |
| C | -5.067348000000 | -0.439014000000 | -1.923112000000 |
| H | -3.993367000000 | -0.632717000000 | -1.983969000000 |
| H | -5.262816000000 | 0.492532000000  | -2.468555000000 |
| H | -5.583270000000 | -1.246197000000 | -2.458341000000 |
| C | 5.067278000000  | -0.439063000000 | 1.923148000000  |
| H | 3.993296000000  | -0.632777000000 | 1.983964000000  |
| H | 5.262719000000  | 0.492474000000  | 2.468616000000  |
| H | 5.583188000000  | -1.246251000000 | 2.458380000000  |
| C | 7.096506000000  | -0.037171000000 | 0.542005000000  |
| H | 7.557895000000  | 0.054610000000  | -0.445396000000 |
| H | 7.619362000000  | -0.840216000000 | 1.076481000000  |
| H | 7.284099000000  | 0.897221000000  | 1.084818000000  |
| C | -3.803588000000 | -1.974327000000 | 0.362504000000  |
| H | -3.701913000000 | -2.591354000000 | -0.539920000000 |
| H | -3.523173000000 | -2.624428000000 | 1.202413000000  |
| C | 5.246571000000  | -0.384080000000 | -1.652750000000 |
| H | 4.541915000000  | -0.507911000000 | -2.481627000000 |
| H | 6.237727000000  | -0.175922000000 | -2.059600000000 |
| C | -7.096529000000 | -0.037155000000 | -0.541889000000 |
| H | -7.557886000000 | 0.054593000000  | 0.445528000000  |
| H | -7.619401000000 | -0.840181000000 | -1.076377000000 |
| H | -7.284137000000 | 0.897256000000  | -1.084665000000 |

**Table S9.** Optimized geometry of the **ground state** of **[ZnCl<sub>2</sub>]** in Cartesian (XYZ) coordinates as calculated in Gaussian at the B3LYP/LANL2DZ/6-31+g(d) level of theory.

|    |                 |                 |                 |
|----|-----------------|-----------------|-----------------|
| Zn | -0.000076000000 | -1.766385000000 | -0.000146000000 |
| Cl | -0.250426000000 | -2.688284000000 | -2.050337000000 |
| Cl | 0.250148000000  | -2.692427000000 | 2.048079000000  |
| N  | -1.455688000000 | -0.053557000000 | 0.161257000000  |
| C  | -3.365605000000 | 1.403054000000  | 0.367378000000  |
| N  | 1.455732000000  | -0.053569000000 | -0.160273000000 |
| C  | 2.778354000000  | 0.113231000000  | -0.303326000000 |
| C  | 4.862792000000  | 1.429265000000  | -0.553550000000 |
| H  | 5.254213000000  | 2.449947000000  | -0.622295000000 |
| C  | -1.185531000000 | 2.372191000000  | 0.128784000000  |
| C  | 3.673909000000  | -1.105449000000 | -0.381644000000 |
| H  | 3.345395000000  | -1.735998000000 | -1.218862000000 |
| H  | 3.538139000000  | -1.707774000000 | 0.526342000000  |
| C  | -0.718423000000 | 1.058431000000  | 0.079451000000  |
| C  | 3.365614000000  | 1.403022000000  | -0.366847000000 |
| C  | 0.718470000000  | 1.058426000000  | -0.078570000000 |
| C  | 2.559829000000  | 2.545902000000  | -0.276372000000 |
| H  | 3.014095000000  | 3.533216000000  | -0.324952000000 |
| C  | -2.778329000000 | 0.113258000000  | 0.304096000000  |
| C  | 0.000012000000  | 3.324066000000  | 0.000280000000  |
| H  | -0.094597000000 | 3.979828000000  | -0.875305000000 |
| H  | 0.094611000000  | 3.979940000000  | 0.875780000000  |
| C  | 5.141796000000  | -0.682882000000 | -0.571887000000 |
| H  | 5.795071000000  | -1.557142000000 | -0.661154000000 |
| C  | -5.141838000000 | -0.682865000000 | 0.572218000000  |
| H  | -5.795102000000 | -1.557143000000 | 0.661397000000  |

|   |                 |                 |                 |
|---|-----------------|-----------------|-----------------|
| C | 1.185560000000  | 2.372187000000  | -0.128142000000 |
| C | -2.559815000000 | 2.545922000000  | 0.276857000000  |
| H | -3.014085000000 | 3.533243000000  | 0.325248000000  |
| C | 5.559919000000  | 0.431027000000  | 0.458186000000  |
| C | -5.205634000000 | 0.404580000000  | 1.680485000000  |
| H | -4.492722000000 | 0.323486000000  | 2.507598000000  |
| H | -6.207435000000 | 0.544878000000  | 2.089250000000  |
| C | 5.205350000000  | 0.404494000000  | -1.680244000000 |
| H | 6.207070000000  | 0.544743000000  | -2.089227000000 |
| H | 4.492255000000  | 0.323378000000  | -2.507191000000 |
| C | -3.673887000000 | -1.105420000000 | 0.382366000000  |
| H | -3.345592000000 | -1.735863000000 | 1.219757000000  |
| H | -3.537858000000 | -1.707861000000 | -0.525500000000 |
| C | 5.048100000000  | 0.350532000000  | 1.899071000000  |
| H | 5.515399000000  | -0.494321000000 | 2.419847000000  |
| H | 3.965295000000  | 0.225408000000  | 1.978388000000  |
| H | 5.314732000000  | 1.261589000000  | 2.449827000000  |
| C | -4.862803000000 | 1.429283000000  | 0.553815000000  |
| H | -5.254293000000 | 2.449949000000  | 0.622389000000  |
| C | -5.047538000000 | 0.350413000000  | -1.898773000000 |
| H | -3.964749000000 | 0.225022000000  | -1.977820000000 |
| H | -5.313806000000 | 1.261568000000  | -2.449550000000 |
| H | -5.514903000000 | -0.494296000000 | -2.419719000000 |
| C | -5.559718000000 | 0.430961000000  | -0.458027000000 |
| C | -7.082257000000 | 0.637641000000  | -0.501209000000 |
| H | -7.328803000000 | 1.557447000000  | -1.045975000000 |
| H | -7.542166000000 | 0.706342000000  | 0.488746000000  |
| H | -7.560174000000 | -0.196451000000 | -1.029427000000 |
| C | 7.082485000000  | 0.637604000000  | 0.501015000000  |
| H | 7.329239000000  | 1.557225000000  | 1.045993000000  |
| H | 7.542115000000  | 0.706596000000  | -0.489047000000 |
| H | 7.560493000000  | -0.196685000000 | 1.028842000000  |

**Table S10.** Optimized geometry of the **first singlet excited state** of **[ZnLCl<sub>2</sub>]** in Cartesian (XYZ) coordinates as calculated in Gaussian at the B3LYP/LANL2DZ/6-31+g(d) level of theory.

|    |                 |                 |                 |
|----|-----------------|-----------------|-----------------|
| Zn | -0.000005000000 | -1.750898000000 | 0.000002000000  |
| Cl | -0.279438000000 | -2.777380000000 | -2.017232000000 |
| Cl | 0.279417000000  | -2.777441000000 | 2.017204000000  |
| N  | -1.433498000000 | -0.074232000000 | 0.166678000000  |
| C  | -3.349858000000 | 1.412442000000  | 0.382847000000  |
| N  | 1.433488000000  | -0.074233000000 | -0.166654000000 |
| C  | 2.759759000000  | 0.117798000000  | -0.315443000000 |
| C  | 4.834025000000  | 1.438757000000  | -0.565582000000 |
| H  | 5.230938000000  | 2.456726000000  | -0.635774000000 |
| C  | -1.186968000000 | 2.403852000000  | 0.133342000000  |
| C  | 3.660387000000  | -1.091259000000 | -0.386458000000 |
| H  | 3.336210000000  | -1.724848000000 | -1.225464000000 |
| H  | 3.510781000000  | -1.698901000000 | 0.517256000000  |
| C  | -0.697065000000 | 1.071481000000  | 0.081022000000  |
| C  | 3.349850000000  | 1.412437000000  | -0.382831000000 |
| C  | 0.697056000000  | 1.071480000000  | -0.080996000000 |
| C  | 2.546277000000  | 2.589120000000  | -0.284478000000 |

|   |                 |                 |                 |
|---|-----------------|-----------------|-----------------|
| H | 3.007342000000  | 3.571161000000  | -0.335679000000 |
| C | -2.759770000000 | 0.117800000000  | 0.315459000000  |
| C | -0.000003000000 | 3.354263000000  | 0.000012000000  |
| H | -0.097795000000 | 4.010077000000  | -0.875018000000 |
| H | 0.097790000000  | 4.010077000000  | 0.875042000000  |
| C | 5.130068000000  | -0.676868000000 | -0.567318000000 |
| H | 5.781459000000  | -1.553568000000 | -0.647413000000 |
| C | -5.130078000000 | -0.676863000000 | 0.567320000000  |
| H | -5.781476000000 | -1.553558000000 | 0.647407000000  |
| C | 1.186961000000  | 2.403850000000  | -0.133317000000 |
| C | -2.546284000000 | 2.589124000000  | 0.284498000000  |
| H | -3.007348000000 | 3.571165000000  | 0.335697000000  |
| C | 5.542022000000  | 0.438088000000  | 0.461245000000  |
| C | -5.198624000000 | 0.400390000000  | 1.681357000000  |
| H | -4.494867000000 | 0.309712000000  | 2.514609000000  |
| H | -6.203752000000 | 0.554147000000  | 2.078427000000  |
| C | 5.198620000000  | 0.400388000000  | -1.681352000000 |
| H | 6.203752000000  | 0.554145000000  | -2.078415000000 |
| H | 4.494866000000  | 0.309713000000  | -2.514608000000 |
| C | -3.660399000000 | -1.091258000000 | 0.386471000000  |
| H | -3.336230000000 | -1.724847000000 | 1.225481000000  |
| H | -3.510789000000 | -1.698901000000 | -0.517241000000 |
| C | 5.020414000000  | 0.368936000000  | 1.898207000000  |
| H | 5.495072000000  | -0.463879000000 | 2.431786000000  |
| H | 3.938292000000  | 0.232661000000  | 1.966988000000  |
| H | 5.271408000000  | 1.289514000000  | 2.440235000000  |
| C | -4.834032000000 | 1.438761000000  | 0.565588000000  |
| H | -5.230951000000 | 2.456729000000  | 0.635776000000  |
| C | -5.020333000000 | 0.368935000000  | -1.898195000000 |
| H | -3.938206000000 | 0.232661000000  | -1.966926000000 |
| H | -5.271304000000 | 1.289510000000  | -2.440239000000 |
| H | -5.494966000000 | -0.463884000000 | -2.431791000000 |
| C | -5.542000000000 | 0.438092000000  | -0.461257000000 |
| C | -7.060326000000 | 0.661700000000  | -0.507635000000 |
| H | -7.296600000000 | 1.585797000000  | -1.049364000000 |
| H | -7.525178000000 | 0.727066000000  | 0.480096000000  |
| H | -7.542258000000 | -0.165999000000 | -1.043417000000 |
| C | 7.060349000000  | 0.661695000000  | 0.507558000000  |
| H | 7.296647000000  | 1.585796000000  | 1.049269000000  |
| H | 7.525155000000  | 0.727051000000  | -0.480196000000 |
| H | 7.542303000000  | -0.166001000000 | 1.043325000000  |

**Table S11.** Optimized geometry of the **ground state** of  $[\text{ZnL}^{\text{O}}\text{Cl}_2]$  in Cartesian (XYZ) coordinates as calculated in Gaussian at the B3LYP/LANL2DZ/6-31+g(d) level of theory.

|    |                 |                 |                 |
|----|-----------------|-----------------|-----------------|
| Zn | 0.000052000000  | -1.895996000000 | 0.000201000000  |
| Cl | -0.254841000000 | -2.787935000000 | -2.055622000000 |
| Cl | 0.254748000000  | -2.789366000000 | 2.055299000000  |
| N  | -1.460583000000 | -0.167356000000 | 0.161642000000  |
| N  | 1.460537000000  | -0.167296000000 | -0.161248000000 |
| C  | -4.871431000000 | 1.330790000000  | 0.553621000000  |
| H  | -5.259701000000 | 2.352207000000  | 0.621874000000  |
| C  | 4.871282000000  | 1.331035000000  | -0.553692000000 |

|   |                 |                 |                 |
|---|-----------------|-----------------|-----------------|
| H | 5.259471000000  | 2.352493000000  | -0.621794000000 |
| C | -3.374420000000 | 1.301845000000  | 0.367965000000  |
| C | 3.374328000000  | 1.301987000000  | -0.367513000000 |
| C | -2.789398000000 | 0.011535000000  | 0.304766000000  |
| C | 2.789337000000  | 0.011650000000  | -0.304535000000 |
| C | -3.685426000000 | -1.204137000000 | 0.383206000000  |
| H | -3.355192000000 | -1.834099000000 | 1.220612000000  |
| H | -3.546062000000 | -1.806995000000 | -0.524221000000 |
| C | 3.685373000000  | -1.203985000000 | -0.383600000000 |
| H | 3.354764000000  | -1.833837000000 | -1.220927000000 |
| H | 3.546473000000  | -1.806980000000 | 0.523822000000  |
| C | -5.153346000000 | -0.781371000000 | 0.572014000000  |
| H | -5.806103000000 | -1.655818000000 | 0.660889000000  |
| C | 5.153192000000  | -0.781116000000 | -0.572893000000 |
| H | 5.805955000000  | -1.655506000000 | -0.662298000000 |
| C | -5.568912000000 | 0.332763000000  | -0.458725000000 |
| C | 5.569149000000  | 0.332704000000  | 0.458060000000  |
| C | -5.216066000000 | 0.306252000000  | 1.679951000000  |
| H | -4.504514000000 | 0.224561000000  | 2.508225000000  |
| H | -6.217785000000 | 0.448827000000  | 2.087419000000  |
| C | 5.215464000000  | 0.306852000000  | -1.680507000000 |
| H | 4.503577000000  | 0.225461000000  | -2.508517000000 |
| H | 6.217031000000  | 0.449526000000  | -2.088309000000 |
| C | -7.090999000000 | 0.542383000000  | -0.502415000000 |
| H | -7.551457000000 | 0.611538000000  | 0.487170000000  |
| H | -7.569715000000 | -0.290700000000 | -1.031299000000 |
| H | -7.335103000000 | 1.462770000000  | -1.046923000000 |
| C | 7.091269000000  | 0.542214000000  | 0.501237000000  |
| H | 7.570275000000  | -0.291794000000 | 1.028411000000  |
| H | 7.335699000000  | 1.461653000000  | 1.047180000000  |
| H | 7.551127000000  | 0.613092000000  | -0.488497000000 |
| C | -5.056317000000 | 0.251529000000  | -1.899284000000 |
| H | -5.320110000000 | 1.163390000000  | -2.449656000000 |
| H | -5.525558000000 | -0.591987000000 | -2.420297000000 |
| H | -3.973746000000 | 0.123554000000  | -1.979792000000 |
| C | 5.057105000000  | 0.250850000000  | 1.898779000000  |
| H | 5.526345000000  | -0.593083000000 | 2.419141000000  |
| H | 3.974528000000  | 0.123117000000  | 1.979636000000  |
| H | 5.321341000000  | 1.162325000000  | 2.449559000000  |
| C | -2.563729000000 | 2.443193000000  | 0.276908000000  |
| H | -2.994979000000 | 3.439936000000  | 0.322134000000  |
| C | 2.563629000000  | 2.443308000000  | -0.275988000000 |
| H | 2.994866000000  | 3.440065000000  | -0.321029000000 |
| C | -1.194618000000 | 2.248568000000  | 0.129694000000  |
| C | 1.194550000000  | 2.248622000000  | -0.128601000000 |
| C | -0.725743000000 | 0.937409000000  | 0.080176000000  |
| C | 0.725700000000  | 0.937436000000  | -0.079383000000 |
| C | -0.000049000000 | 3.170321000000  | 0.000633000000  |
| O | -0.000076000000 | 4.383378000000  | 0.000619000000  |

**Table S12.** Optimized geometry of the **first singlet excited state** of  $[\text{ZnL}^{\text{O}}\text{Cl}_2]$  in Cartesian (XYZ) coordinates as calculated in Gaussian at the B3LYP/LANL2DZ/6-31+g(d) level of theory.

|    |                 |                 |                 |
|----|-----------------|-----------------|-----------------|
| Zn | -0.000005000000 | -1.931224000000 | -0.000063000000 |
| Cl | -0.265916000000 | -2.834038000000 | -2.050521000000 |
| Cl | 0.265829000000  | -2.834541000000 | 2.050158000000  |
| N  | -1.459436000000 | -0.209884000000 | 0.166491000000  |
| N  | 1.459459000000  | -0.209921000000 | -0.166593000000 |
| C  | -4.818907000000 | 1.358391000000  | 0.556829000000  |
| H  | -5.205836000000 | 2.379335000000  | 0.624485000000  |
| C  | 4.818992000000  | 1.358267000000  | -0.556752000000 |
| H  | 5.205935000000  | 2.379197000000  | -0.624547000000 |
| C  | -3.338320000000 | 1.322927000000  | 0.372846000000  |
| C  | 3.338373000000  | 1.322844000000  | -0.373013000000 |
| C  | -2.759015000000 | -0.018105000000 | 0.310432000000  |
| C  | 2.759055000000  | -0.018174000000 | -0.310422000000 |
| C  | -3.684858000000 | -1.208801000000 | 0.394069000000  |
| H  | -3.373008000000 | -1.837986000000 | 1.240024000000  |
| H  | -3.550972000000 | -1.826007000000 | -0.504793000000 |
| C  | 3.684909000000  | -1.208889000000 | -0.393676000000 |
| H  | 3.373192000000  | -1.838236000000 | -1.239559000000 |
| H  | 3.550881000000  | -1.825921000000 | 0.505284000000  |
| C  | -5.142846000000 | -0.757731000000 | 0.574125000000  |
| H  | -5.813045000000 | -1.618729000000 | 0.662714000000  |
| C  | 5.142926000000  | -0.757858000000 | -0.573589000000 |
| H  | 5.813137000000  | -1.618876000000 | -0.661904000000 |
| C  | -5.531273000000 | 0.358312000000  | -0.461356000000 |
| C  | 5.531191000000  | 0.358384000000  | 0.461739000000  |
| C  | -5.182516000000 | 0.327684000000  | 1.681178000000  |
| H  | -4.475144000000 | 0.229857000000  | 2.511043000000  |
| H  | -6.179772000000 | 0.504582000000  | 2.086437000000  |
| C  | 5.182774000000  | 0.327342000000  | -1.680845000000 |
| H  | 4.475532000000  | 0.229355000000  | -2.510803000000 |
| H  | 6.180093000000  | 0.504164000000  | -2.085980000000 |
| C  | -7.045790000000 | 0.605856000000  | -0.512283000000 |
| H  | -7.509918000000 | 0.683803000000  | 0.474941000000  |
| H  | -7.538820000000 | -0.217320000000 | -1.043950000000 |
| H  | -7.265865000000 | 1.530768000000  | -1.058644000000 |
| C  | 7.045701000000  | 0.605929000000  | 0.512862000000  |
| H  | 7.538644000000  | -0.217140000000 | 1.044775000000  |
| H  | 7.265693000000  | 1.530952000000  | 1.059071000000  |
| H  | 7.509989000000  | 0.683675000000  | -0.474303000000 |
| C  | -5.005895000000 | 0.273136000000  | -1.896902000000 |
| H  | -5.231093000000 | 1.198678000000  | -2.440763000000 |
| H  | -5.498502000000 | -0.548730000000 | -2.430569000000 |
| H  | -3.927113000000 | 0.108889000000  | -1.966760000000 |
| C  | 5.005583000000  | 0.273493000000  | 1.897217000000  |
| H  | 5.498093000000  | -0.548274000000 | 2.431125000000  |
| H  | 3.926787000000  | 0.109275000000  | 1.966932000000  |
| H  | 5.230705000000  | 1.199140000000  | 2.440933000000  |
| C  | -2.530170000000 | 2.454231000000  | 0.277027000000  |
| H  | -2.958174000000 | 3.451924000000  | 0.321903000000  |
| C  | 2.530208000000  | 2.454169000000  | -0.277575000000 |
| H  | 2.958211000000  | 3.451852000000  | -0.322671000000 |
| C  | -1.153963000000 | 2.268566000000  | 0.127055000000  |
| C  | 1.153970000000  | 2.268537000000  | -0.127837000000 |
| C  | -0.692932000000 | 0.902160000000  | 0.078438000000  |



|   |                 |                |                 |
|---|-----------------|----------------|-----------------|
| C | 0.692934000000  | 0.902143000000 | -0.078967000000 |
| C | -0.000021000000 | 3.180438000000 | -0.000716000000 |
| O | 0.000144000000  | 4.430432000000 | 0.000633000000  |

**Table S13.** Excited state properties of **L** at the relaxed ground state geometry (**S<sub>0</sub>**) as calculated in Gaussian at the B3LYP/6-31+g(d) level of theory. Transitions with contribution >10% are shown.

| State | Energy (eV) | Energy (nm) | Contributions (%)                              | Oscillator strength | Character                   |
|-------|-------------|-------------|------------------------------------------------|---------------------|-----------------------------|
| S1    | 4.1800      | 297         | HOMO -> LUMO (91.5)                            | 0.7010              | $\pi - \pi^*$               |
| S2    | 4.3715      | 284         | HOMO-1 -> LUMO (97.2)                          | 0.0032              | $\sigma - \pi^*, n - \pi^*$ |
| S3    | 4.4654      | 278         | HOMO-2 -> LUMO (94.5)                          | 0.0000              | $\sigma - \pi^*, n - \pi^*$ |
| S4    | 4.5770      | 271         | HOMO -> LUMO+1 (91.0)                          | 0.1071              | $\pi - \pi^*$               |
| S5    | 4.8167      | 257         | HOMO-3 -> LUMO (21.8)<br>HOMO -> LUMO+3 (67.0) | 0.0113              | $\pi - \pi^*$               |

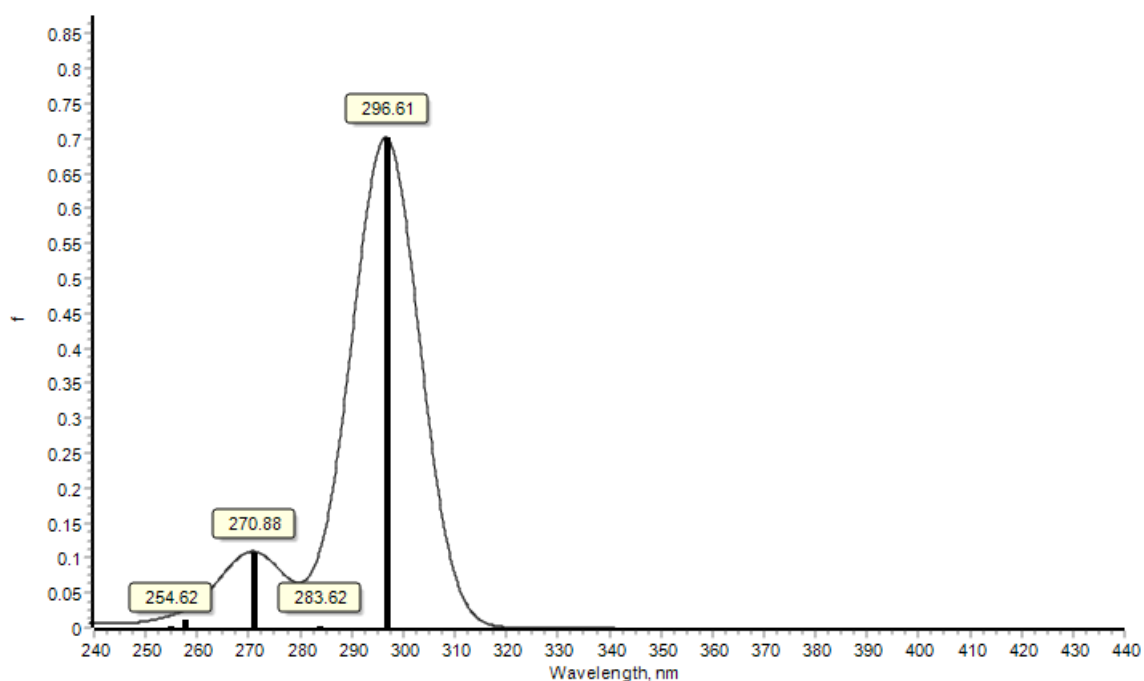

**Figure S23.** Calculated absorption spectrum of **L**.

**Table S14.** Isosurface contour plots of the molecular orbitals of **L** at the relaxed ground state geometry (**S<sub>0</sub>**) as calculated in Gaussian at the B3LYP/6-31+g(d) level of theory.

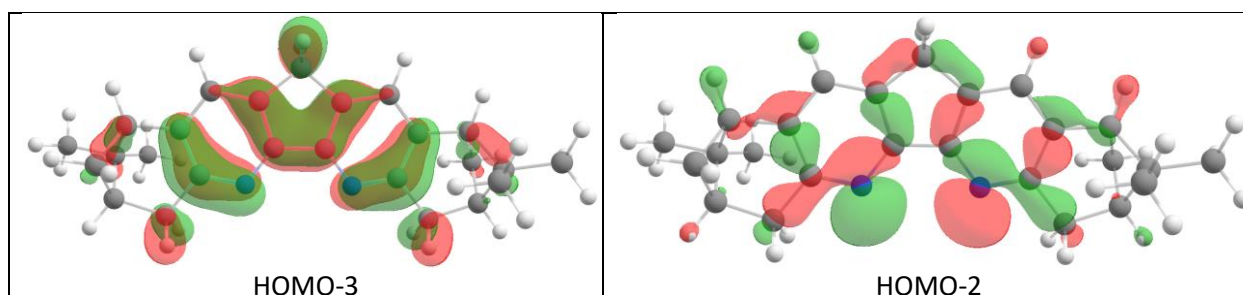

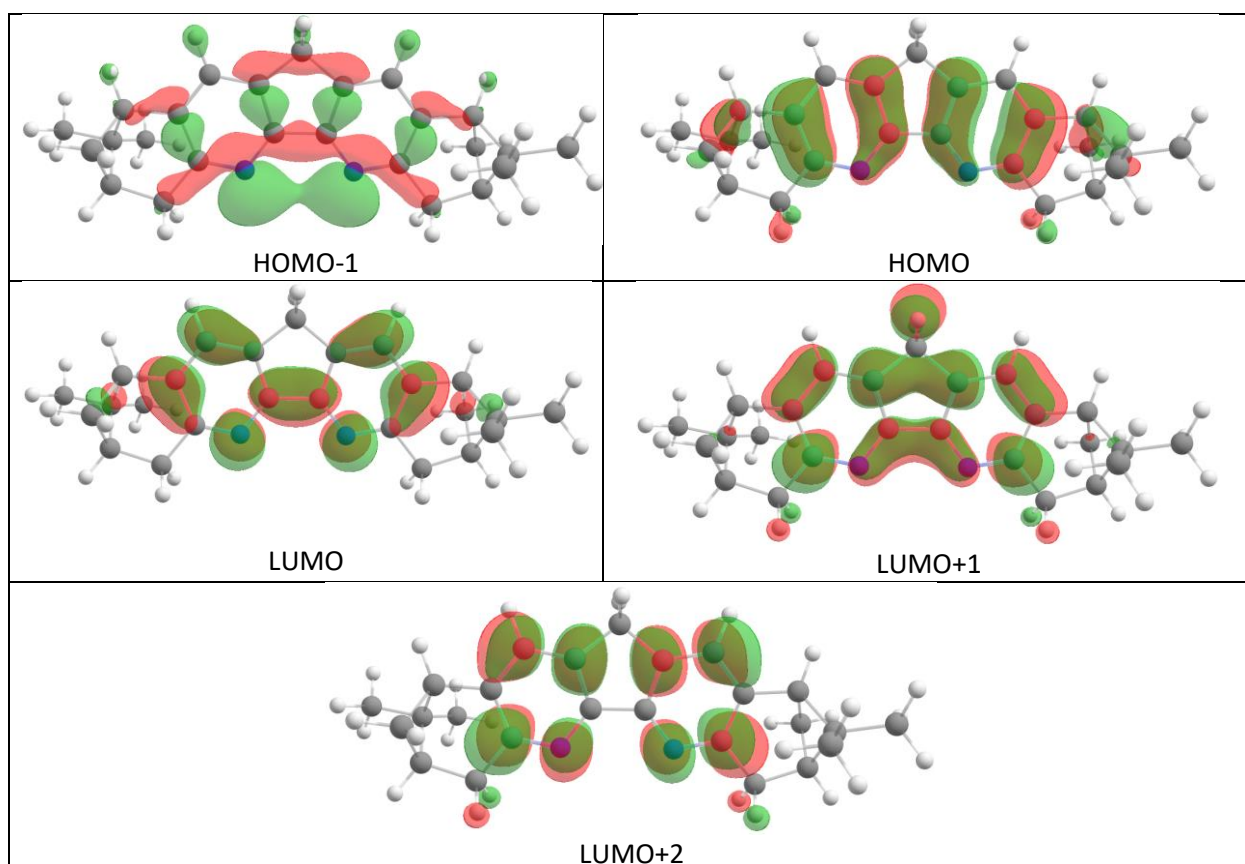

**Table S15.** Excited state properties of  $L^0$  at the relaxed ground state geometry ( $S_0$ ) as calculated in Gaussian at the B3LYP/6-31+g(d) level of theory. Transitions with contribution >10% are shown.

| State | Energy (eV) | Energy (nm) | Contributions (%)                              | Oscillator strength | Character                      |
|-------|-------------|-------------|------------------------------------------------|---------------------|--------------------------------|
| S1    | 2.9420      | 421         | HOMO -> LUMO (99.1)                            | 0.0001              | $\pi - \pi^*$ , ILCT           |
| S2    | 2.9776      | 416         | HOMO-1 -> LUMO (93.5)                          | 0.0000              | $\sigma - \pi^*$ , $n - \pi^*$ |
| S3    | 3.6193      | 343         | HOMO-2 -> LUMO (97.9)                          | 0.0000              | $\sigma - \pi^*$ , $n - \pi^*$ |
| S4    | 4.0013      | 310         | HOMO-4 -> LUMO (86.1)                          | 0.0000              | $\sigma - \pi^*$ , $n - \pi^*$ |
| S5    | 4.0678      | 305         | HOMO-5 -> LUMO (20.6)<br>HOMO -> LUMO+1 (76.8) | 0.2702              | $\pi - \pi^*$ , ILCT           |
| S6    | 4.2474      | 292         | HOMO-1 -> LUMO+1 (90.1)                        | 0.0000              | $\sigma - \pi^*$ , $n - \pi^*$ |
| S7    | 4.4757      | 277         | HOMO-3 -> LUMO (84.3)                          | 0.0396              | $\pi - \pi^*$ , ILCT           |
| S8    | 4.4983      | 276         | HOMO-2 -> LUMO+1 (92.0)                        | 0.0039              | $\sigma - \pi^*$ , $n - \pi^*$ |
| S9    | 4.6798      | 265         | HOMO-6 -> LUMO (46.1)<br>HOMO -> LUMO+2 (42.3) | 0.0015              | $\pi - \pi^*$ , ILCT           |
| S10   | 4.8468      | 256         | HOMO-5 -> LUMO (77.4)<br>HOMO -> LUMO+1 (20.5) | 1.0717              | $\pi - \pi^*$ , ILCT           |

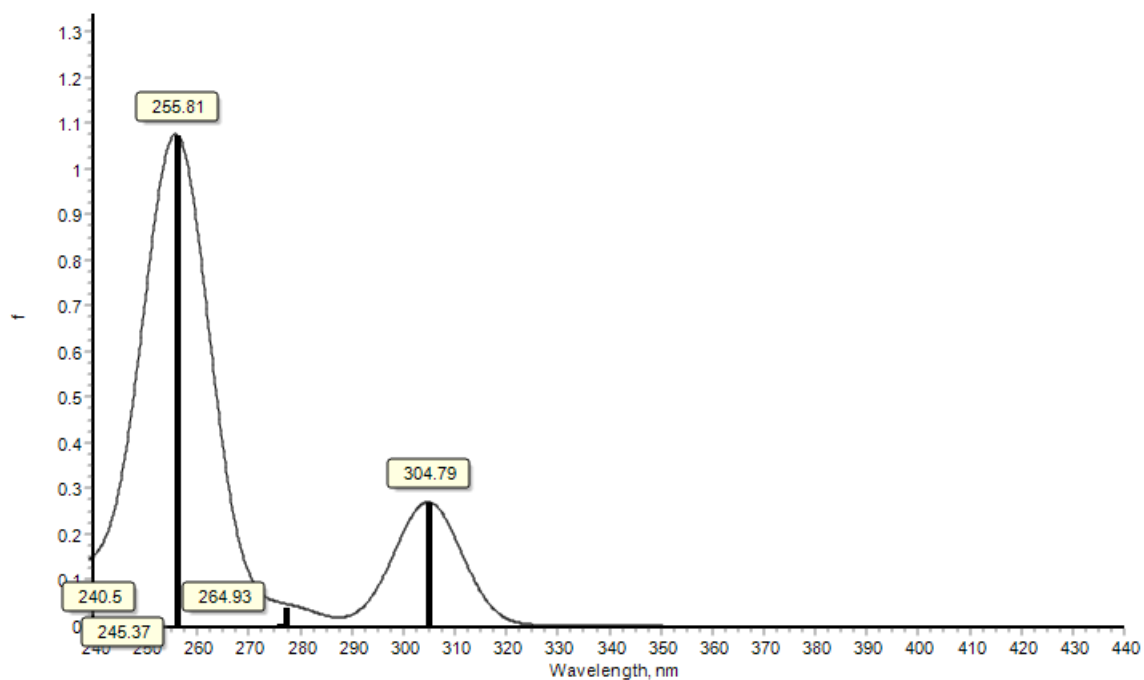

**Figure S24.** Calculated absorption spectrum of  $L^0$ .

**Table S16.** Isosurface contour plots of the molecular orbitals of  $L^0$  at the relaxed ground state geometry ( $S_0$ ) as calculated in Gaussian at the B3LYP/6-31+g(d) level of theory.

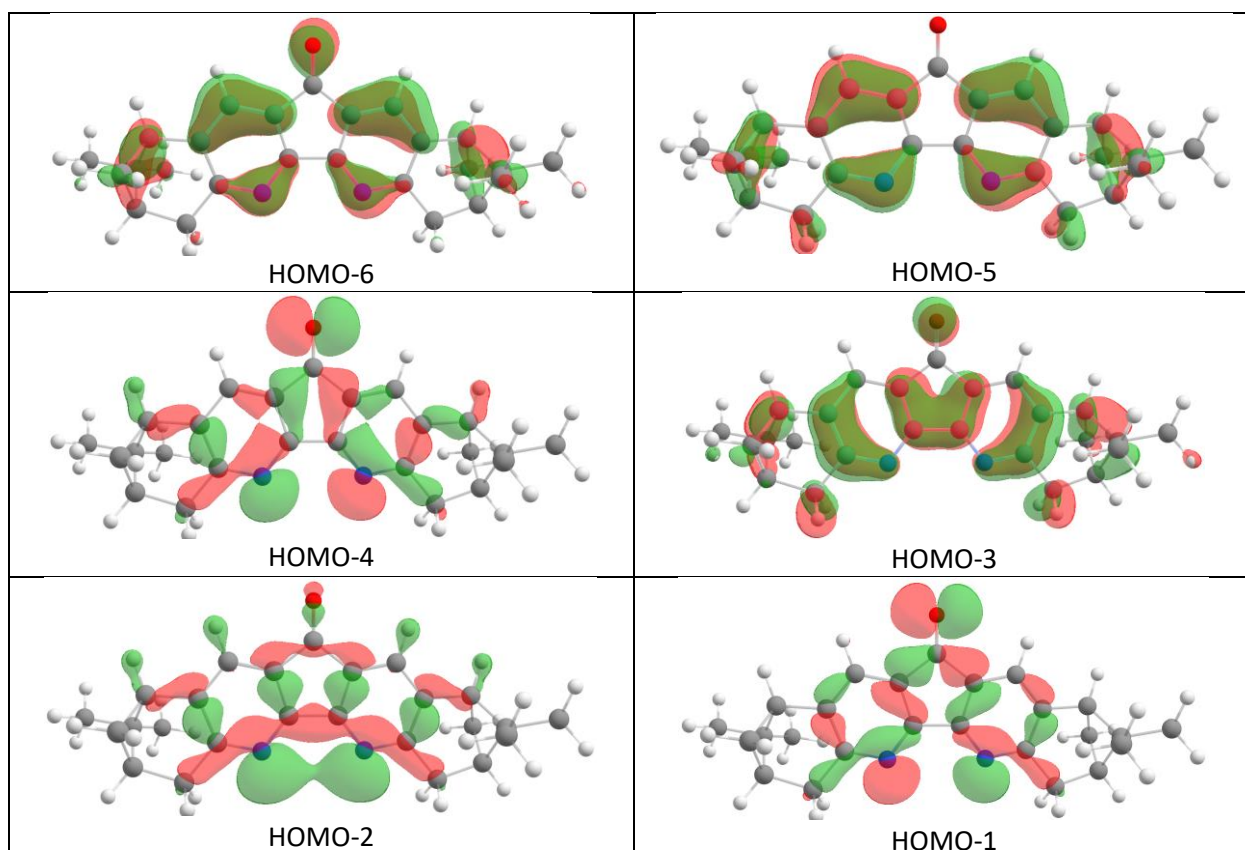

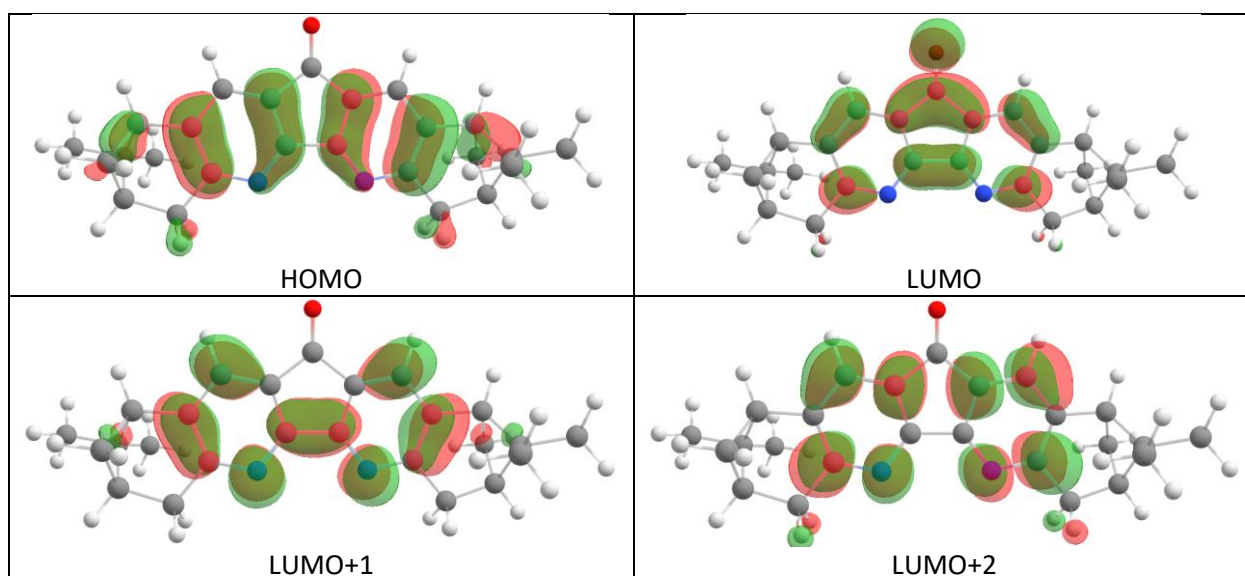

**Table S17.** Excited state properties of  $[\text{ZnLCl}_2]$  at the relaxed ground state geometry ( $S_0$ ) as calculated in Gaussian at the B3LYP/LANL2DZ/6-31+g(d) level of theory. Transitions with contribution >10% are shown.

| State | Energy (eV) | Energy (nm) | Contributions (%)                              | Oscillator strength | Character           |
|-------|-------------|-------------|------------------------------------------------|---------------------|---------------------|
| S1    | 3.6555      | 339         | HOMO -> LUMO (99.9)                            | 0.0030              | XLCT                |
| S2    | 3.7116      | 334         | HOMO-2 -> LUMO (29.9)<br>HOMO-1 -> LUMO (69.7) | 0.0378              | XLCT, $\pi - \pi^*$ |
| S3    | 3.7712      | 329         | HOMO-3 -> LUMO (99.4)                          | 0.0026              | XLCT                |
| S4    | 3.8398      | 323         | HOMO-4 -> LUMO (99.4)                          | 0.0000              | XLCT                |
| S5    | 3.9099      | 317         | HOMO-2 -> LUMO (67.9)<br>HOMO-1 -> LUMO (27.6) | 0.5545              | XLCT, $\pi - \pi^*$ |
| S6    | 4.4501      | 279         | HOMO -> LUMO+1 (94.9)                          | 0.0002              | XLCT                |
| S7    | 4.4914      | 276         | HOMO-1 -> LUMO+1 (94.5)                        | 0.0982              | XLCT, $\pi - \pi^*$ |

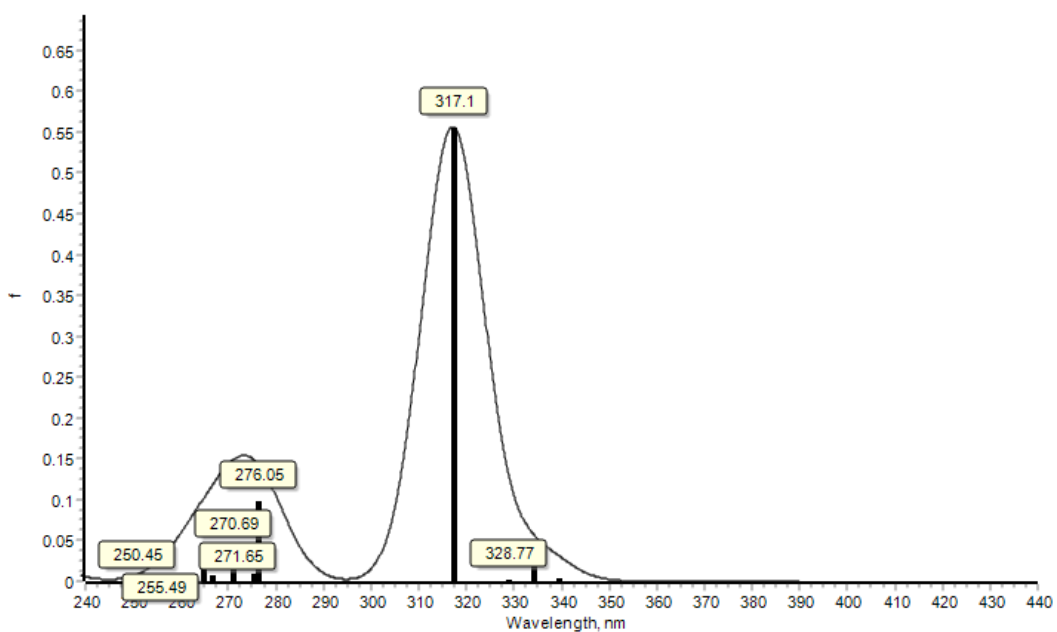

**Figure S25.** Calculated absorption spectrum of  $[\text{ZnLCl}_2]$ .

**Table S18.** Isosurface contour plots of the molecular orbitals of  $[\text{ZnLCl}_2]$  at the relaxed ground state geometry ( $S_0$ ) as calculated in Gaussian at the B3LYP/LANL2DZ/6-31+g(d) level of theory.

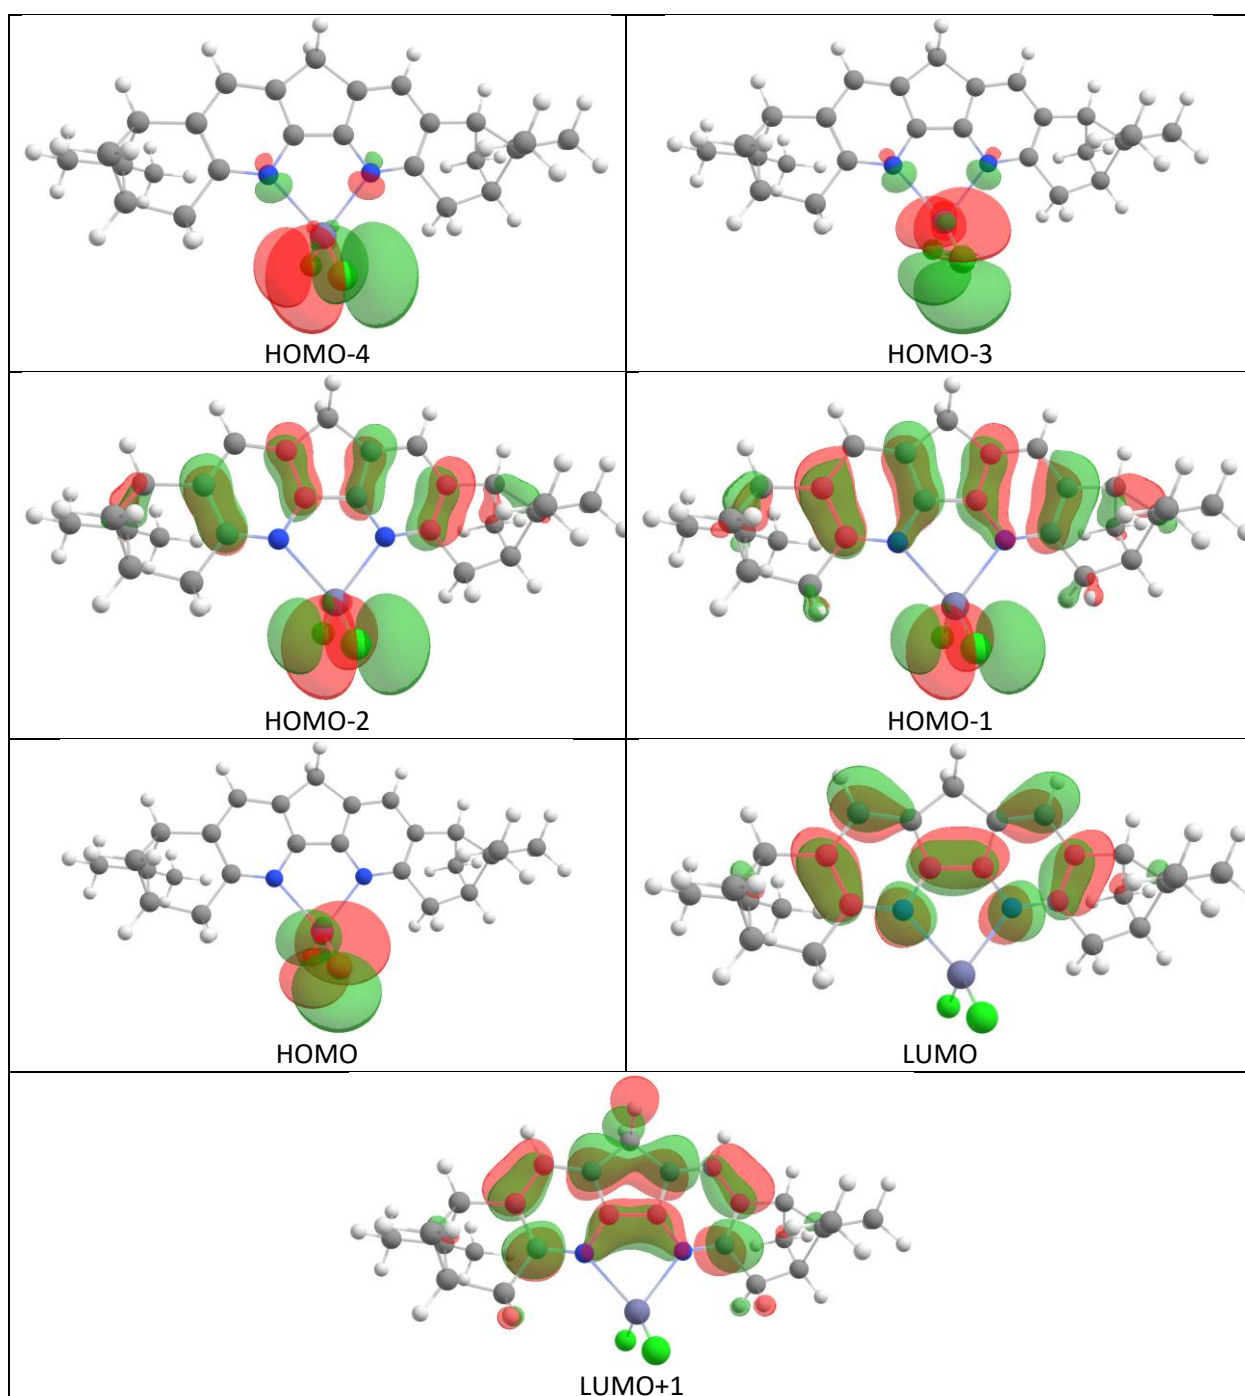

**Table S19.** Excited state properties of  $[\text{ZnL}^0\text{Cl}_2]$  at the relaxed ground state geometry ( $S_0$ ) as calculated in Gaussian at the B3LYP/LANL2DZ/6-31+g(d) level of theory. Transitions with contribution >10% are shown.

| State | Energy (eV) | Energy (nm) | Contributions (%)                                                    | Oscillator strength | Character                  |
|-------|-------------|-------------|----------------------------------------------------------------------|---------------------|----------------------------|
| S1    | 2.9260      | 424         | HOMO-3 $\rightarrow$ LUMO (51.5)<br>HOMO-1 $\rightarrow$ LUMO (47.7) | 0.0025              | XLCT, $\pi - \pi^*$ , ILCT |
| S2    | 2.9829      | 416         | HOMO $\rightarrow$ LUMO (99.8)                                       | 0.0000              | XLCT                       |
| S3    | 3.0525      | 406         | HOMO-6 $\rightarrow$ LUMO (47.6)                                     | 0.0000              | $\pi - \pi^*$ , ILCT       |

|     |        |     |                                                |        |                            |
|-----|--------|-----|------------------------------------------------|--------|----------------------------|
|     |        |     | HOMO-4 -> LUMO (49.5)                          |        |                            |
| S4  | 3.0763 | 403 | HOMO-3 -> LUMO (47.6)<br>HOMO-1 -> LUMO (52.0) | 0.0000 | XLCT, $\pi - \pi^*$ , ILCT |
| S5  | 3.1013 | 400 | HOMO-2 -> LUMO (99.4)                          | 0.0000 | XLCT                       |
| S6  | 3.2734 | 379 | HOMO-6 -> LUMO (46.8)<br>HOMO-4 -> LUMO (50.2) | 0.0000 | $\pi - \pi^*$ , ILCT       |
| S7  | 3.6055 | 344 | HOMO -> LUMO+1 (99.7)                          | 0.0032 | XLCT                       |
| S8  | 3.6603 | 339 | HOMO-1 -> LUMO+1 (96.4)                        | 0.0191 | XLCT                       |
| S12 | 3.8669 | 321 | HOMO-3 -> LUMO+1 (87.7)                        | 0.3829 | XLCT, $\pi - \pi^*$        |
| S23 | 4.7015 | 264 | HOMO-11 -> LUMO (84.7)                         | 0.4227 | $\pi - \pi^*$ , ILCT       |

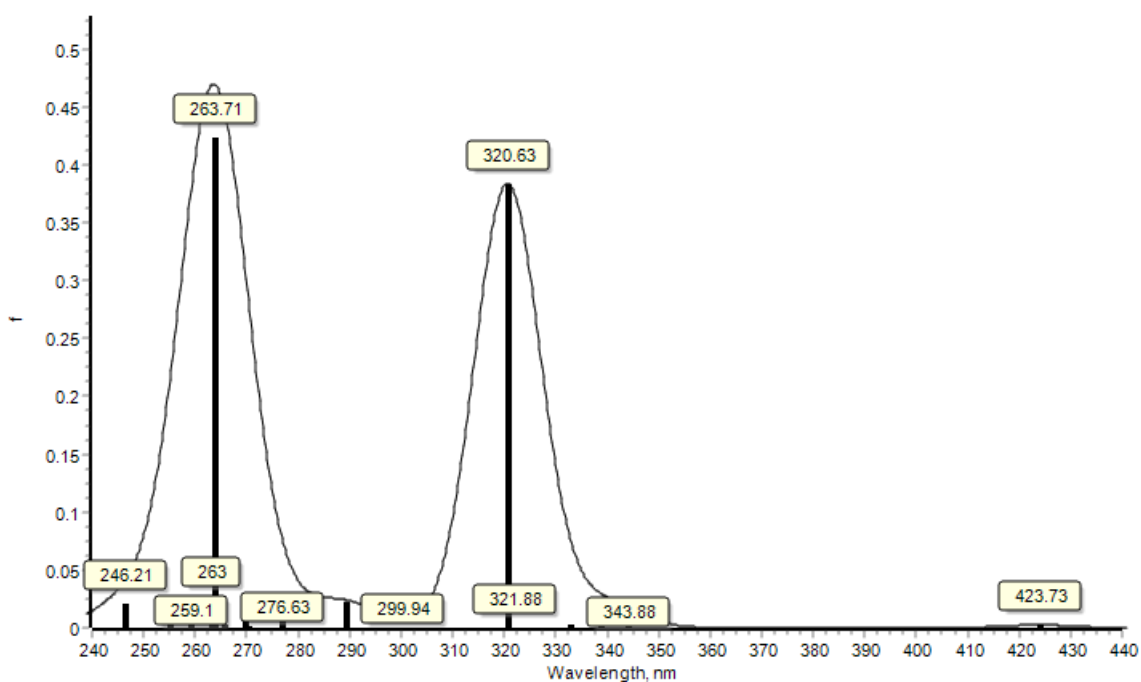

**Figure S26.** Calculated absorption spectrum of  $[\text{ZnL}^{\text{O}}\text{Cl}_2]$ .

**Table S20.** Isosurface contour plots of the molecular orbitals of  $[\text{ZnL}^{\text{O}}\text{Cl}_2]$  at the relaxed ground state geometry ( $S_0$ ) as calculated in Gaussian at the B3LYP/LANL2DZ/6-31+g(d) level of theory.

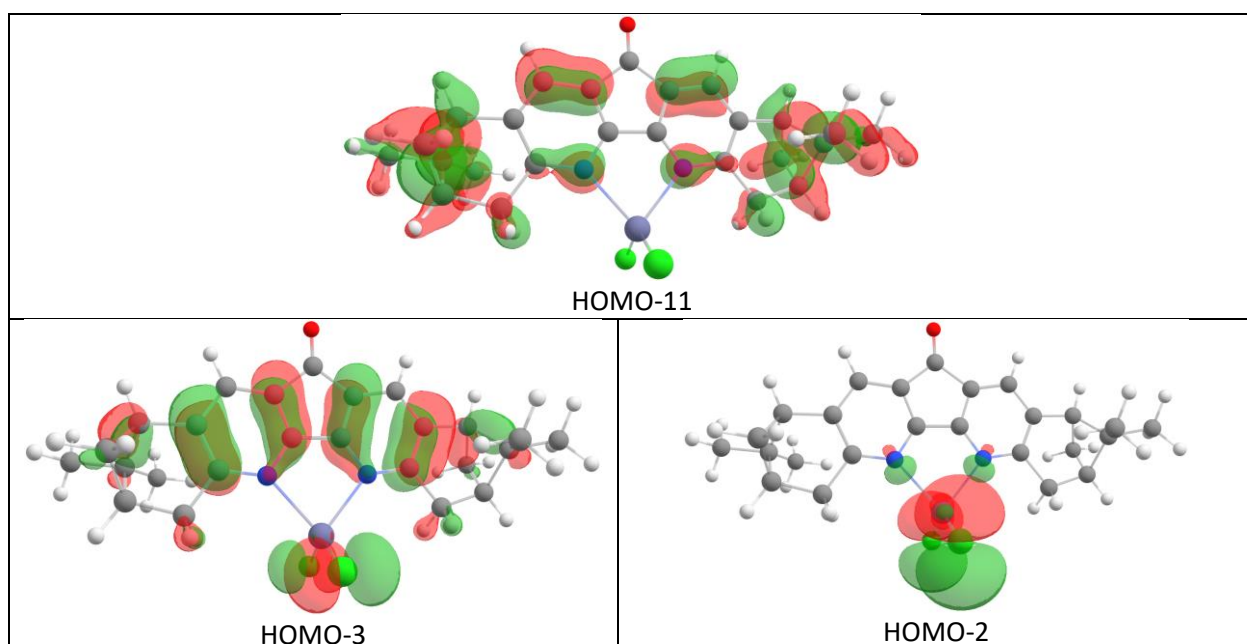

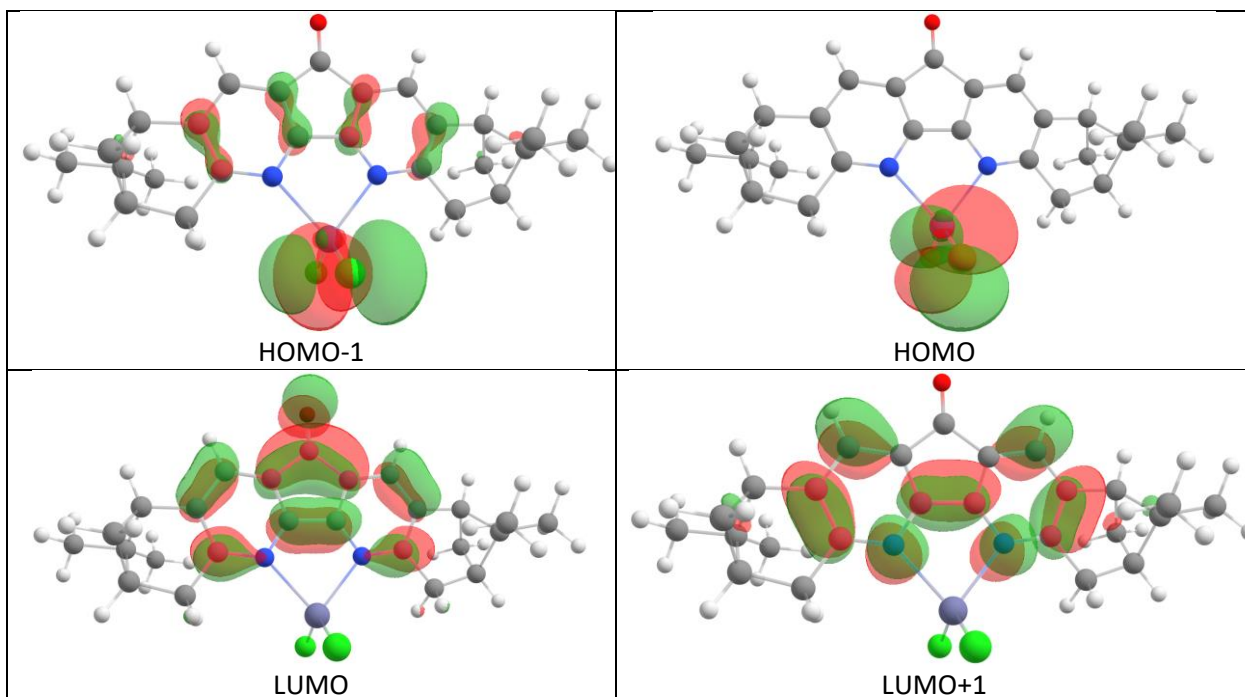

**Table S21.** Comparison of the most relevant bond lengths for L.

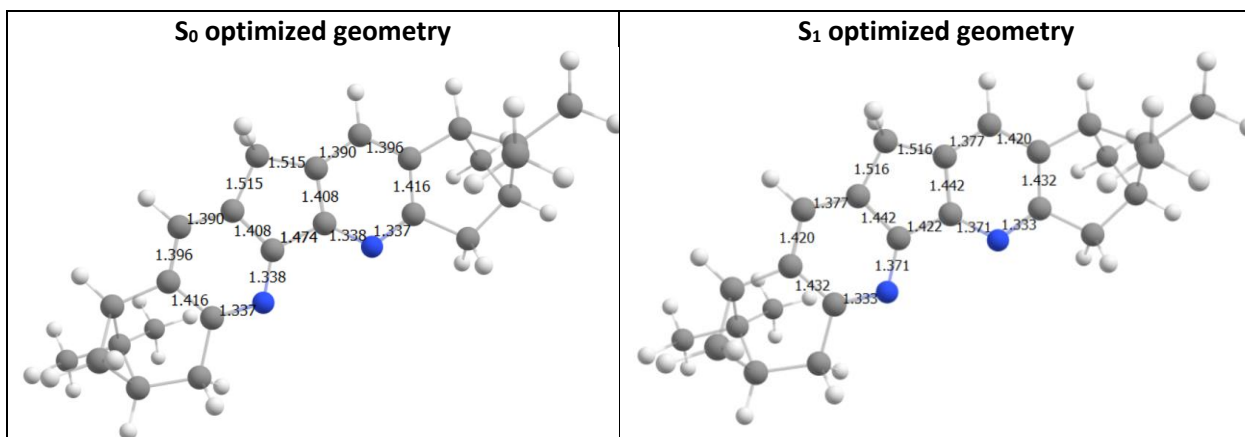

**Table S22.** Comparison of the most relevant bond lengths for L<sup>o</sup>.

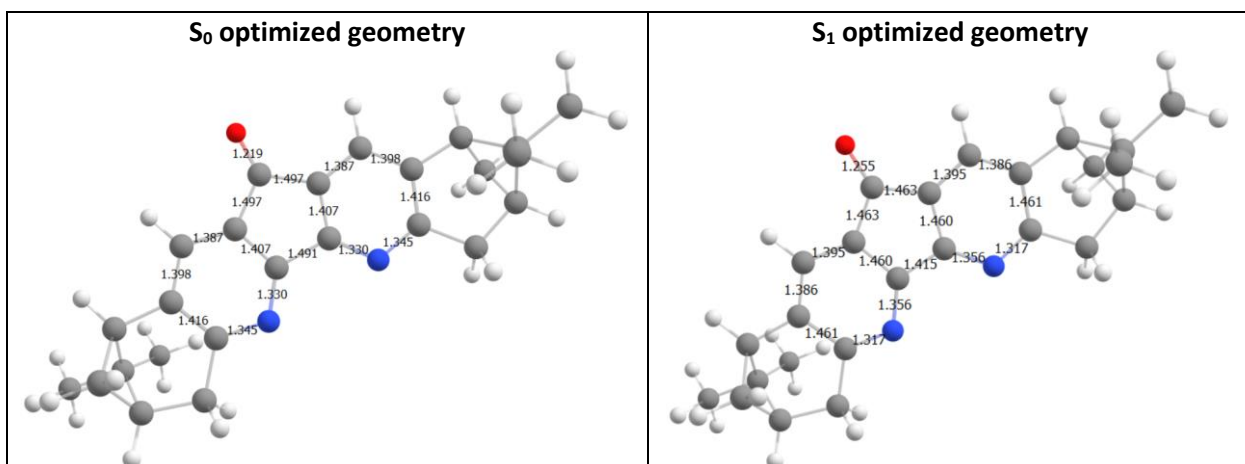

**Table S23.** Comparison of the most relevant bond lengths for  $[\text{ZnLCl}_2]$ .

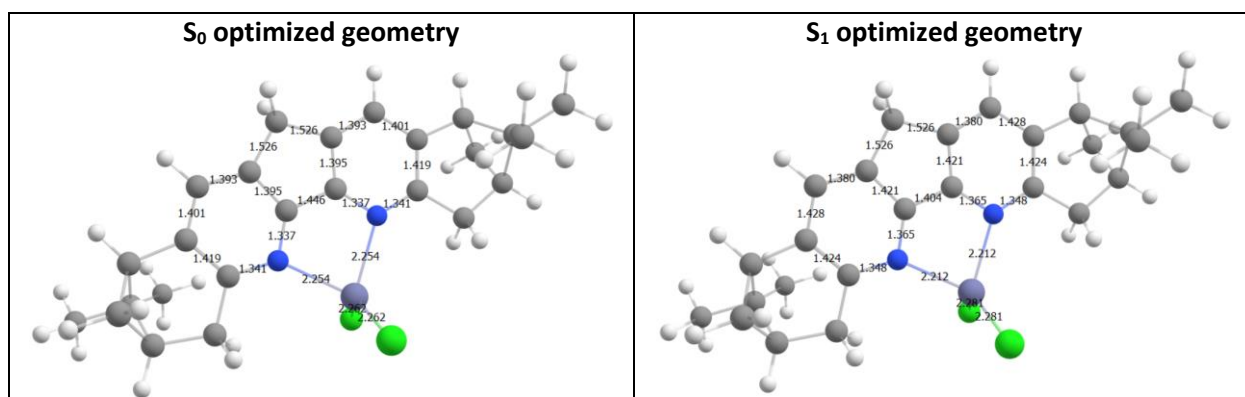

**Table S24.** Comparison of the most relevant bond lengths for  $[\text{ZnL}^{\text{O}}\text{Cl}_2]$ .

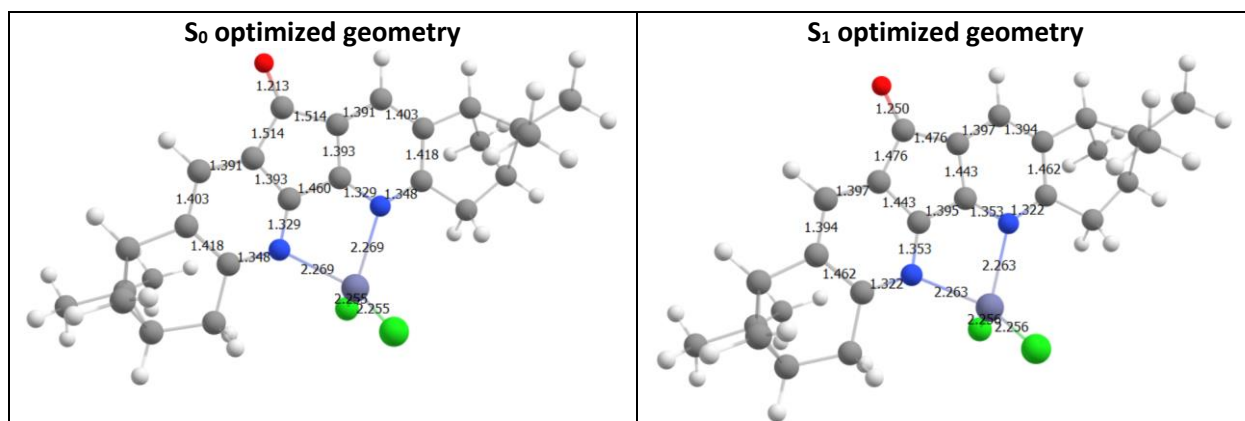

Supplement: d3dt00904a1.pdf [file d3dt00904a1.pdf]
